## Isolation and Gene Flow in a Speciation Continuum in Newts

M. Pabijan\*<sup>1,2</sup>, P. Zieliński<sup>1</sup>, K. Dudek<sup>1</sup>, M. Stuglik<sup>1,3</sup>, W. Babik\*<sup>1</sup>

<sup>1</sup>*Institute of Environmental Sciences, Jagiellonian University, ul. Gronostajowa 7, 30-387, Kraków, Poland*

<sup>2</sup>*Department of Comparative Anatomy, Institute of Zoology, Jagiellonian University, ul. Gronostajowa 9, 30-387, Kraków, Poland*

<sup>3</sup>*Scotland's Rural College, Integrative Animal Sciences, Easter Bush Campus, Midlothian EH25 9RG, Scotland, UK*

Key Words: delimitation, reticulate evolution, taxonomy, amphibian

\* corresponding authors

Corresponding authors:

Maciej Pabijan, Department of Comparative Anatomy, Institute of Zoology, Jagiellonian University, ul. Gronostajowa 9, 30-387, [maciej.pabijan@uj.edu.pl](mailto:maciej.pabijan@uj.edu.pl)

Wiesław Babik, Institute of Environmental Sciences, Jagiellonian University, ul. Gronostajowa 7, 30-387, Kraków, Poland; [wieslaw.babik@uj.edu.pl](mailto:wieslaw.babik@uj.edu.pl)

Running title: Species delimitation and gene flow in newts

## 1 **Abstract**

2 The evolution of reproductive isolation is a prolonged process that fosters genetic exchange between  
3 differentiating metapopulation lineages. Gene flow between incipient species provides an opportunity  
4 to quantify and understand the impact of gene flow on the accumulation of divergence along the  
5 speciation continuum. Here we delimit taxa, reconstruct phylogeny and infer gene flow in newts of the  
6 *Lissotriton vulgaris* species complex based on 74 nuclear markers sequenced for 127 populations.  
7 Using several species delimitation and phylogenetic methods, we recovered nine allo- and parapatric  
8 taxa, and obtained a partially resolved phylogeny. Approximate Bayesian Computation modeling  
9 detected historical and recent gene flow between several taxa, including non-sister pairs. Gene flow  
10 among taxa in Central Europe (*L. v. ampelensis*, *L. v. meridionalis*, two morphologically cryptic taxa  
11 within *L. v. vulgaris*) suggests that these lineages are non-independent and possibly in the process of  
12 merging in some areas. Three southern lineages (*L. v. graecus*, *L. v. kosswigi*, *L. v. lantzi*) have  
13 acquired the population genetic hallmarks of independent species, whereas the status of *L. v.*  
14 *schmidtleri* remains uncertain. We identified hybridization, causing extensive haplotype sharing  
15 between non-sister lineages, as an important source of genealogical discordance, positively misleading  
16 multispecies coalescent-based species tree methods. We also obtained strong statistical support for  
17 widespread mtDNA introgression, suggested by previously observed discordance between mtDNA  
18 phylogeny and morphology. Our study shows that distinct metapopulation lineages along the  
19 speciation continuum can exchange nontrivial amounts of genes and emphasizes an urgent need for  
20 effective methods accounting for gene flow in species tree reconstruction.

21

## 22 **Introduction**

23 Speciation, regardless of the mechanisms or geographic settings in which it occurs, is  
24 typically a gradual process (Coyne & Orr 2004). The consequences of this are manifold. First,  
25 we see various stages of speciation in nature which makes delimitation of separately evolving  
26 units challenging (Wiens 2007; Huang & Knowles 2016). Second, completion of speciation is  
27 by no means certain, other outcomes such as fusions or extinction are also likely (e.g. Rhymer  
28 & Simberloff 1996; Rudman & Schluter 2016). Gene flow may homogenize diverging gene  
29 pools (Slatkin 1985; Petit & Excoffier 2009), thereby limiting or even reversing  
30 differentiation. Third, it remains to be seen to what extent diagnosable metapopulation  
31 lineages evolve separately with respect to sharing adaptively significant genetic variation  
32 (Rieseberg & Burke 2001; Rieseberg *et al.* 2004). Fourth, it is unclear how much “neutral”  
33 gene flow occurs between differentiating lineages, whether contact between such lineages  
34 causes massive introgression, and to what extent introgression is heterogeneous throughout  
35 the genome (Cruikshank & Hahn 2014; Wolf & Ellegren 2016).

36         Although theory provides some guidelines, the preceding questions are mostly  
37 empirical and need to be addressed by studying natural systems. Recent spectacular adaptive  
38 radiations may be less informative and more exceptional in this respect than commonly  
39 assumed, because extinction may not have yet had sufficient time to prune the more  
40 ephemeral products of divergent selection (Cutter & Gray 2016). Therefore, careful analyses  
41 of taxa composed of metapopulation lineages at various stages of divergence (de Queiroz  
42 2007), which can be referred to as a speciation continuum, are needed. Because the necessary  
43 analyses lie at the interface of population genetics and phylogenetics, they require integration  
44 of tools from both fields. This is especially important for studies that explicitly incorporate  
45 gene flow into the equation, because population genetic approaches for inferring post-  
46 divergence gene flow are better developed than methods co-estimating phylogeny and gene

47 flow (Sousa & Hey 2013). Likewise, accounting for post-divergence gene flow is a major  
48 challenge for current species delimitation methods (Petit & Excoffier 2009).

49 European newts from the *Lissotriton vulgaris* group may provide an empirical  
50 example of a speciation continuum influenced by genetic exchange between taxa. The  
51 Carpathian newt, *L. montandoni* (Boulenger, 1880) and the smooth newt, *Lissotriton vulgaris*  
52 (Linnaeus, 1758), have parapatric distributions in central Europe (Fig. 1a; Rafiński & Arntzen  
53 1987; Macgregor *et al.* 1990). The former is endemic to the Carpathian mountains, whereas  
54 the latter has a very large range in Central and Northern Europe, with a disjunct population  
55 surrounding the Greater Caucasus mountains (Fig. 1a). At the intraspecific level, *L.*  
56 *montandoni* is morphologically uniform across its range, mirrored by only shallow genetic  
57 substructuring (Zieliński *et al.* 2014). In sharp contrast, *L. vulgaris* is morphologically  
58 differentiated into at least seven subspecies (Fig. 1a; Raxworthy 1990). The smooth newt is  
59 found in a variety of habitats across the collective ranges of the subspecies (Bousbouras &  
60 Ioannidis 1997; Bour *et al.* 2002; Schmidtler & Franzen 2004; Skorinov *et al.* 2008) from  
61 deciduous woodlands, farmlands and pastures in European lowlands and mountainous  
62 regions, forest-steppe and taiga in western Siberia and Kazakhstan and pockets of humid  
63 habitat in otherwise dry woodland or scrub in southern Europe and Anatolia. Despite over a  
64 century of study, the status of the *L. vulgaris* subspecies is still controversial (Schmidtler &  
65 Franzen 2004; Dubois & Raffaëlli 2009; Speybroeck *et al.* 2010; Wielstra *et al.* 2015). The  
66 disagreement has been exacerbated by a general lack of concordance between  
67 morphologically assessed subspecific boundaries and spatial patterns of mtDNA variation  
68 (Fig. 1a, Fig. S1; Babik *et al.* 2005; Nadachowska & Babik 2009; Pabijan *et al.* 2015). The  
69 traits used to distinguish the smooth newt subspecies pertain almost exclusively to male  
70 secondary sexual characters, which include the presence/absence and extent of dorsal crests  
71 and tail fins, toe flaps, tail filament, dorso-lateral ridges and pigmentation patterns

72 (Raxworthy 1990) that develop in aquatic habitat during the breeding season. Despite  
73 divergent courtship behavior (Pecio & Rafiński 1985) that leads to strong but incomplete  
74 prezygotic sexual isolation between *L. montandoni* and *L. vulgaris* (Michalak *et al.* 1997;  
75 Michalak & Rafiński 1999), these two species hybridize in and around the Carpathian  
76 mountains forming a bimodal hybrid zone (Kotlík & Zavadil 1999; Babik *et al.* 2003; Babik  
77 & Rafiński 2004). Hybridization has led to the replacement of the original mtDNA of *L.*  
78 *montandoni* by introgressed mtDNA of several *L. vulgaris* lineages (Babik *et al.* 2005;  
79 Zieliński *et al.* 2013). Moreover, genetic exchange among the different subspecies of *L.*  
80 *vulgaris* is suggested because five of the subspecific taxa do not form monophyletic mtDNA  
81 lineages (Fig. S1; Babik *et al.* 2005; Nadachowska & Babik 2009; Pabijan *et al.* 2015). Areas  
82 of subspecies intergradation with morphological intermediates have been reported in central  
83 and southeastern Europe (e.g. Schmidtler & Schmidtler 1983; Krizmanic *et al.* 1997;  
84 Schmidtler & Franzen 2004; Wielstra *et al.* 2015). These findings suggest that introgressive  
85 hybridization both between *L. vulgaris* and *L. montandoni*, and among the various subspecies  
86 of *L. vulgaris*, has the potential to blur boundaries among the different taxa.

87         Here, we provide a multi-faceted perspective on the stages of divergence in the *L.*  
88 *vulgaris* complex. First, we postulate that morphologically diagnosable taxa within the  
89 complex constitute separately evolving metapopulation lineages (de Quieroz 2007) and test  
90 this assertion using a clustering approach based on allele frequencies, a Bayesian multispecies  
91 coalescent delimitation method, and the genealogical sorting index. Second, we hypothesize  
92 that extensive reticulation has occurred in the evolutionary history of the *L. vulgaris* complex,  
93 with the potential to mislead multispecies coalescent-based species tree reconstruction  
94 (Leaché *et al.* 2014; Solís-Lemus *et al.* 2016). This issue is addressed by including  
95 phylogenetic methods based on concatenation, concordance and a method that explicitly takes  
96 reticulation into account. Third, we predict that the extent of historical gene flow was most

97 extensive among lineages inhabiting Central Europe, and use an Approximate Bayesian  
98 Computation framework to model gene flow between pairs of taxa. Finally, we apply the  
99 inferred nuclear phylogeny to statistically test the previously proposed hypothesis of  
100 extensive mtDNA introgression among morphologically diagnosable taxa. We demonstrate  
101 that isolation in space and time as well as post-divergence gene flow shape the genetic  
102 background of a set of metapopulations that have diverged in ecology and morphology  
103 including male epigamic traits.

## 104 **Materials and Methods**

### 105 *Newt Sampling*

106 Tissues (tail-tips) were sampled from 127 newt populations (i.e. breeding sites, Table S1 and  
107 Fig. 1b). Our sampling focused on capturing the genetic variation present in all  
108 morphologically defined taxa within the *L. vulgaris* group and all potential Pleistocene  
109 refugia (Babik *et al.* 2005; Nadachowska & Babik 2009; Pabijan *et al.* 2015) and was  
110 therefore mostly limited to southeastern and central Europe. One individual was sampled per  
111 locality. Altogether we analysed sequence data for 128 individuals (plus outgroup) which  
112 included 42 reported in Zieliński *et al.* (2016) and 87 sequenced for this study (Table S1).

### 113 *Laboratory Procedures and Datasets*

114 DNA from ethanol preserved tissues was extracted using either a standard phenol/chloroform  
115 technique or the Wizard Genomic DNA extraction kit (Promega). Amplification and  
116 sequencing of a panel of 74 nuclear, mostly 3'UTR markers, followed Zieliński *et al.* (2014).  
117 This procedure resulted in physically phased sequences of both haplotypes for most markers  
118 in most individuals. We used five different datasets for analyses (Table S2) i) dataset 1 with  
119 all 74 loci and all 128 individuals, ii) dataset 2 with all 74 loci but with 118 individuals

120 (excluded 9 admixed individuals and one of two newts from locality Kapakli), iii) dataset 3  
121 with all 128 individuals but 70 loci (excluded 4 loci with > 10% missing sequences), iv)  
122 dataset 4 consisting of SNPs from 71 loci (excluded loci with >10% missing data at  
123 nucleotide positions) and 120 individuals (including outgroup).

#### 124 *Species Delimitation*

125 Species delimitation was based on identifying distinct genetic groups from haplotype  
126 frequency data and validating the putative OTUs (operational taxonomic units) using  
127 multispecies coalescent-based and genealogical sorting methods.

128         Sequence alignments (dataset 1) were converted into input for STRUCTURE v.2.3.4  
129 (Pritchard *et al.* 2000) by coding each haplotype as a unique integer in a custom Python script.  
130 If nucleotide sequences contained over 10 Ns or gaps, they were coded as missing data, if  
131 they had less than 10 Ns or gaps, then columns with missing data were removed from the  
132 alignment. This procedure ensured that haplotype identity was based on nucleotide  
133 differences between sequences (and not on e.g. indels or low-quality data) and provided a  
134 conservative estimate of the number of haplotypes per locus. STRUCTURE was run under the  
135 admixture model ( $\alpha = 1.0$ ) with independent allele frequencies among populations ( $\lambda = 1.0$ )  
136 for  $K$  from 1 to 12, iterated 10 times each. The Markov chain in each analysis was set to 1  
137 million burnin steps; a further 2 million steps were used for parameter value estimation.  
138 STRUCTURE HARVESTER (Earl & vonHoldt 2012) and CLUMPAK (Kopelman *et al.*  
139 2015) were used process the STRUCTURE output and to evaluate the most probable number  
140 of clusters ( $K$ ) by examining  $\log\text{Pr}(\text{Data})$ .

141         We validated the genetic clusters identified by STRUCTURE by applying joint  
142 Bayesian species delimitation and species tree estimation using the program BPP v3.1 (Yang  
143 2015). This approach is based on the multispecies coalescent and compares different models

144 of species delimitation and species phylogeny in a Bayesian framework, accounting for  
145 incomplete lineage sorting and gene tree-species tree conflict (Yang & Rannala 2010;  
146 Rannala & Yang 2013; Yang & Rannala 2014). Input alignments were constructed from  
147 dataset 2 by taking 10 sequences per marker for each of the 9 STRUCTURE-defined genetic  
148 clusters (i.e., operational taxonomic units, OTUs). This sampling strategy was based on the  
149 minimum number of sequences available per taxon (imposed by 5 specimens of *L. v.*  
150 *meridionalis*), with random subsampling of 10 sequences (without replacement) in all other  
151 taxa. Admixed individuals (as defined by STRUCTURE) were excluded from this analysis.  
152 We explored a wide variety of priors on the population size parameters ( $\theta$ s) and divergence  
153 time at the root of the species tree ( $\tau_0$ ) (see Extended Methods in the Supplementary  
154 Material).

155         Next, we estimated gene trees in MrBayes 3.2 (Ronquist *et al.* 2012), and used them as  
156 input to assess genealogical sorting and in Bayesian concordance analysis (see below). We  
157 applied dataset 3; outgroups consisted of a single, randomly chosen haplotype per locus of a  
158 *Lissotriton helveticus* individual, or if unavailable due to lack of amplification, a single  
159 haplotype from either *L. italicus* (for 3 markers) or *L. boscai* (for 9 markers) from Zieliński *et*  
160 *al.* (2014). Nucleotide substitution models for each marker were determined in jModeltest  
161 2.1.4 (Darriba *et al.* 2012) under the Bayesian information criterion. Due to the low  
162 phylogenetic information content for many of the analyzed loci, we did not partition the  
163 alignments into codon positions for those markers in coding regions. We implemented two  
164 runs each with four chains for 3 million generations with trees and parameters sampled every  
165 3000 generations. Convergence was assessed by comparing the  $-\ln L$  values between runs and  
166 by examining parameter values for a subset of markers in Tracer (Rambaut & Drummond  
167 2007). We discarded half of recorded gene trees as burnin, combined runs and constructed an  
168 extended majority tree in MrBayes (allcompat command).



169 We quantified the genealogical distinctiveness of the STRUCTURE-delimited OTUs  
170 by measuring exclusive ancestry across gene trees with the genealogical sorting index (*gsi*) of  
171 Cummings *et al.* (2008). This statistic measures the genealogical exclusivity of a grouping on  
172 a scale from 0 (random distribution of sequences among groups) to 1 (complete monophyly),  
173 and an ensemble statistic (*egsi*) is used to integrate across gene trees. Because the *gsi* is  
174 sensitive to disparity in group size, we randomly pruned leaves to a sample size of 10 for each  
175 OTU. Admixed individuals were also pruned from gene trees. We used the R implementation  
176 of the *gsi* (genealogicalSorting v.0.92). The null hypothesis that the degree of exclusive  
177 ancestry of each group was observed by chance was evaluated by  $10^6$  permutations.

#### 178 *Phylogeny Estimation*

179 Our first phylogenetic approach involved using individuals as OTU's (operational taxonomic  
180 units) and concatenating the sequences of all loci. This procedure necessitates the selection of  
181 a single haplotype per individual per marker and becomes non-trivial if an OTU is  
182 heterozygous at multiple loci, because the choice of which haplotype to concatenate into the  
183 matrix may influence both the topology and branch support of resultant trees (Weisrock *et al.*  
184 2012). For each individual in dataset 2, we randomly merged haplotypes from each gene into  
185 two concatenated sequences (i.e., each individual was represented by two entries of 36,918  
186 bp consisting of 74 concatenated markers). We then pooled haplotypes for each candidate  
187 species and randomly selected half of the haplotypes from each group for analysis. We  
188 followed Weisrock *et al.* (2012) in conducting ten replicate analyses to assess consistency.  
189 We ran mixed-model phylogenetic analyses in MrBayes 3.2 on the CIPRES Science Gateway  
190 platform (Miller *et al.* 2010). We divided the alignments into 74 partitions corresponding to  
191 markers and assigned the optimal nucleotide substitution models to these partitions as  
192 previously determined by jModeltest. Each analysis consisted of two runs with 8 chains for 20  
193 million generations with trees and parameters sampled every 5000 generations; burnin was set

194 at 50%. Convergence between runs was assessed by examining effective samples sizes and  
195 parameter values between runs in Tracer, and by comparing topologies in AWTY (Nylander  
196 *et al.* 2008).

197 The second phylogenetic method involved using BUCKy (Ané *et al.* 2007; Larget *et*  
198 *al.* 2010) to estimate levels of concordance in reconstructed topologies among the posterior  
199 distributions of gene trees generated in MrBayes. Because the number of unique tips per gene  
200 tree was prohibitive (see Extended Methods), we pruned the gene trees in the MrBayes  
201 posterior distributions by randomly selecting a single tip from each OTU using an R script  
202 from Weisrock *et al.* (2012), modified to accommodate our dataset and subsampling  
203 requirements. Admixed individuals were also pruned from gene trees. We tested a range of  
204 priors and parameter values for BUCKy (see Extended Methods). We pruned the original  
205 gene trees to 10 OTUs (9 candidate species plus outgroup) and repeated the subsampling and  
206 pruning routine 50 times, using BUCKy to calculate the primary concordance trees for each  
207 replicate. We measured clade support by calculating the mean ( $\pm$  SD) sample-wide  
208 concordance factors for clades across all 50 replicates. We also measured clade support by  
209 computing the frequency with which each clade was recovered over all replicates.

210 The \*BEAST module of BEAST v2.1.3 (Heled & Drummond 2010; Bouckaert *et al.*  
211 2014) was used to infer a species tree using the STRUCTURE-defined candidate species. To  
212 increase the efficiency of the MCMCs and decrease run times, we minimized the complexity  
213 of the estimated parameters (see Extended Methods) and randomly subsampled two gene  
214 copies from each *Lissotriton* lineage across the 74 alignments (dataset 2). Because these runs  
215 used only 18 (7.6% of total number) of the gene copies available per marker per analysis, we  
216 repeated the random selection procedure 10 times, constructing 10 input files. Each analysis  
217 was run twice for  $10^9$  generations. After removing 20% burnin from species tree posteriors,  
218 we scaled down the files by taking every eighth tree from the posterior, leaving 2000 trees

219 from each run. The posterior species trees were combined for replicate runs in LogCombiner  
220 v2.1.3, summarized as maximum clade credibility trees in TreeAnnotator v2.1.2, and  
221 visualized in DensiTree v2.1.11 (Bouckaert 2010).

### 222 *Genetic divergence and haplotype sharing*

223 We concatenated all sequences in dataset 2 (without admixed individuals) and used DnaSP v5  
224 (Librado & Rozas 2009) to calculate  $d_{xy}$  values among the new OTUs. The pattern of shared  
225 variation was summarized by counting the numbers of shared haplotypes between among  
226 OTUs in a custom Python script also using dataset 2.

### 227 *TreeMix analyses*

228 We constructed a maximum likelihood tree using TreeMix 1.12 (Pickrell & Pritchard 2012)  
229 which uses a covariance matrix based on allele frequencies of SNPs to infer the evolutionary  
230 relationships among pre-specified populations. The algorithm then identifies populations  
231 more closely related than predicted by the phylogeny and adds a “migration edge” between  
232 them, representing the direction and magnitude of gene flow (Pickrell & Pritchard 2012). We  
233 used the nine Structure-delimited OTUs and an outgroup as populations. Note that allele  
234 frequencies for our outgroup “population” were based on two gene copies because only one  
235 outgroup individual was sequenced per marker (see single gene analyses above). We extracted  
236 and sorted biallelic SNPs at each of the 74 markers according to minor allele frequency  
237 (MAF). Five SNPs with the highest MAF, i.e. most informative at the level of the entire  
238 dataset, were retrieved per marker, under the condition that they contained <10% missing data  
239 at a nucleotide position; these positions were then converted to TreeMix format using a  
240 custom Python script. A total of 71 out of 74 markers met our criteria, resulting in a matrix of  
241 355 SNPs (dataset 4). TreeMix was invoked with  $-k\ 5$  to account for linkage disequilibrium  
242 for SNPs from the same marker. In consecutive analyses, we added from one to five

243 migration edges to allow for gene flow in the tree. We also ran TreeMix with an alternative  
244 dataset using only 1 SNP per marker with the highest MAF.

#### 245 *Gene flow among OTUs modeled by ABC*

246 We estimated gene flow between all pairs of taxa (36 pairwise comparisons) in an  
247 Approximate Bayesian Computation (ABC) framework. We followed Zielinski *et al.* (2016)  
248 in removing all fully coding markers from analyses and also excluded all missing data by  
249 removing loci or individuals in pairwise comparisons; final datasets included 60-66 loci with  
250 between 5 and 24 sequences per taxon (Table S3). The information present in the data was  
251 summarized for each pairwise comparison with a set of 9 summary statistics (Table S3 and  
252 Extended Methods).

253 We tested four simple scenarios of pairwise species divergence and the extent and  
254 timing of interspecific gene flow: i) a no gene flow (NGF) model in which an ancestral  
255 population splits into two at time  $T_{\text{SPLIT}}$  with no genetic exchange between descendant  
256 populations, ii) an admixture (ADM) model in which a fraction of genes is moved  
257 instantaneously from one population to the other; this can occur once independently in each  
258 direction at any time after divergence, iii) a constant gene flow (CGF) model in which gene  
259 flow is continuous and bidirectional between descendent taxa after  $T_{\text{SPLIT}}$ , and iv) a recent  
260 gene flow (RGF) model in which continuous and bidirectional gene flow between descendent  
261 taxa was constrained to have occurred in the last 200,000 years (approximately 50,000 newt  
262 generations).

263 Coalescent simulations were done in fastsimcoal2.01 (Excoffier *et al.* 2013), and the  
264 ABC analysis was conducted within the ABCtoolbox (Wegmann *et al.* 2010). Detailed prior  
265 and parameter values are given in the Extended Methods. A total of  $10^6$  datasets were  
266 simulated under each demographic model from which we retained 1% ( $10^4$ ) best simulations

267 and computed the marginal likelihood of the observed and retained datasets under the  
268 generalized linear model (Leuenberger & Wegmann 2010). To control the type I error for  
269 multiple comparisons, we used a Bonferroni correction and removed models with the nominal  
270  $P < 0.0125$ . The best fitting model was then selected via Bayes factors.

271 We estimated the power to distinguish between the four models within the ABC  
272 framework by randomly picking 1000 pseudo-observed datasets from all simulations  
273 generated for each model and checking how often the ABC procedure correctly predicted the  
274 true model (the one that produced the dataset). Each pseudo-observed dataset was treated as  
275 the observed data and used to calculate marginal densities of all compared models; Bayes  
276 factors were used to select the best model. Because identical prior distributions were used for  
277 all pairwise comparisons, we conducted a single power analysis using populations with the  
278 fewest sequences (*L. v. meridionalis* - *L. v. kosswigi*). This can be considered the minimum  
279 estimate as all other comparisons (with larger sample sizes) will have more power in  
280 distinguishing between models.

### 281 *Statistical test of mtDNA introgression*

282 We formally tested whether the sharing of mtDNA haplotypes among *Lissotriton* groups  
283 could be accounted for by ILS (incomplete lineage sorting) or is due to hybridization. We  
284 assumed that the (partially) resolved nuclear phylogeny reflects true relationships among the  
285 evolutionary lineages within *L. montandoni*/*L. vulgaris* and followed the statistical approach  
286 of Joyce *et al.* (2011). If mtDNA similarities among evolutionary lineages result from ILS,  
287 then mtDNA sequences simulated within the true species tree should replicate the observed  
288 mtDNA data. If mtDNA introgression has occurred, sequences simulated on alternative  
289 species trees, assuming closest relationships between the lineages showing highest mtDNA  
290 similarity, should better reproduce the observed data. Because the relationships between the

291 evolutionary lineages have not been resolved completely, both tests were based on four  
292 lineages with relationships well-supported by nuclear data: i) *N L. v. vulgaris*, *L. v.*  
293 *ampelensis*, *L. v. kosswigi* and *L. montandoni*; ii) *S L. v. vulgaris*, *L. v. meridionalis*, *L. v.*  
294 *schmidleri* and *L. v. graecus* (Fig. 2). For *L. montandoni* two scenarios were evaluated,  
295 allowing introgression from either *L. v. ampelensis* or *N L. v. vulgaris*. For each evolutionary  
296 lineage we randomly sampled one sequence from each locality for which mtDNA sequences  
297 were available (Babik *et al.* 2005; Zieliński *et al.* 2013; Pabijan *et al.* 2015). These sequences  
298 were used to calculate parameters of competing species trees in BPP v3.1. A thousand gene  
299 trees were simulated for each species tree with MCcoal. Sequences were simulated along gene  
300 trees using SeqGen (Rambaut & Grass 1997) assuming the HKA + gamma model of sequence  
301 evolution with parameter values estimated in MEGA6 (Tamura *et al.* 2013). For each scenario  
302 mean and minimum uncorrected (p) distances between evolutionary lineages were calculated  
303 for 1000 simulated datasets and compared to the observed distances to obtain *P* values for  
304 individual comparisons. *P* values from individual tests were combined using Fisher's method.

## 305 **Results**

306 The largest dataset 1 contained 128 individuals and 74 loci with an average of  $72.1 \pm 20.29$   
307 haplotypes/locus (range 29-117) and  $1.9 \pm 3.87$  % missing data per locus. Markers were of  
308 similar length ( $498.9 \pm 6.79$  bp) and highly polymorphic with an average of  $91.8 \pm 34.56$   
309 segregating sites per marker, one third of these ( $29.1 \pm 9.52$ ) were singleton polymorphisms  
310 (Table S4).

### 311 *Species delimitation*

312 Bayesian clustering solutions at  $K \leq 6$  had low probabilities.  $\text{Pr}(K)$  plateaued at  $K = 7$  (Fig.  
313 S2) and therefore we further only considered analyses at  $K = 7-12$  (60 analyses in total). Most  
314 of these 60 analyses contained clusters that grouped all individuals of a given subspecies or

315 species together (Fig. 1B, Table S5). The top ten analyses with highest lnP all contained  $K = 9$   
316 groups with identical arrangements of individuals in clusters. Analyses with  $K > 9$  contained  
317 at least one cluster that was assigned zero or trivial fractions of the data, indicating that under  
318 high  $K$  values, the number of meaningful clusters was lower than the assumed  $K$ . We thus  
319 inferred 9 clusters with high certainty (Fig. 1B, Table S5). Five of these clusters correspond to  
320 morphologically designated species or subspecies: *L. montandoni*, *L. v. graecus*, *L. v.*  
321 *meridionalis*, *L. v. kosswigi* and *L. v. lantzi*. The nominative subspecies was subdivided into  
322 two clusters that we designate North *L. v. vulgaris* (N *L. v. vulgaris*) and South *L. v. vulgaris*  
323 (S *L. v. vulgaris*), with the former living predominantly to the north and east of the Carpathian  
324 arc and the latter to the west and south of the Danube. The genetic cluster encompassing *L. v.*  
325 *schmidleri*, a subspecies described from western Anatolia that is morphologically similar to  
326 the nominative subspecies, was also found in the southeastern Balkans. The genetic cluster  
327 including *L. v. ampelensis* contained four individuals from eastern Slovakia, extreme western  
328 Ukraine and Romania classified as *L. v. vulgaris* according to morphology. Following  
329 Rosenberg *et al.* (2001), we consider that the frequency with which each taxon formed an  
330 exclusive cluster over all 60 analyses is a good measure of its support (Table S5). This ranged  
331 from 70% in *L. v. kosswigi* to 88% in *L. v. graecus* and *L. v. schmidleri* and considerably  
332 exceeded the frequency with which particular taxa clustered together or were split into two or  
333 more groups. Some evidence of additional substructure was found in South *L. v. vulgaris* and  
334 *L. v. graecus* (Fig. S3).

335 Admixture was consistently detected in nine individuals (7.0%; Fig. 1B, see Table S1  
336 for estimated admixture proportions), five of which originated from the western part of the  
337 range of *L. vulgaris* (admixed N *L. v. vulgaris*/S *L. v. vulgaris*, morphologically classified as  
338 *L. v. vulgaris*), a single individual from northern Serbia (*L. v. ampelensis*/S *L. v. vulgaris*,  
339 morphological *L. v. vulgaris*), one from Kosovo (S *L. v. vulgaris*/*L. v. graecus*,

340 morphologically undetermined), and two morphologically undetermined newts from the  
341 Romanian Carpathians composed of two (*N L. v. vulgaris/L. v. ampelensis*) or three (*N L. v.*  
342 *vulgaris/L. v. ampelensis/L. montandoni*) genetic clusters.

343 We conducted joint inference of species delimitation and phylogeny using BPP 3 with  
344 the 9 STRUCTURE-defined genetic clusters as OTUs. The posterior probabilities of each of  
345 these equaled 1.00 in all analyses under a wide range of priors and different starting trees  
346 (Table 1). All models in the 95% credibility sets contained the 9 putative species inferred  
347 from STRUCTURE.

348 We used the gene trees calculated in MrBayes to estimate the genealogical exclusivity  
349 of each candidate species. Typically, each genealogy in the post-burnin posteriors had a  
350 different topology. This was expected because there was limited phylogenetic information  
351 contained within each marker and many tips (257 including outgroup) in the trees.  
352 Unsurprisingly, consensus gene trees calculated for each marker were mostly unresolved, and  
353 showed high levels of discordance (data not shown). Nonetheless, the majority of the  
354 genealogies showed a nonrandom clustering pattern for the delimited *Lissotriton* groups as  
355 indicated by the highly significant *egsi* (Table 2). We inferred high exclusivity for *L. v. lantzi*  
356 and *L. v. kosswigi* with about 40% of genes monophyletic, and moderate *egsi* values for *L. v.*  
357 *graecus*, *L. v. schmidtleri*, *L. v. meridionalis* and *L. montandoni*. The values of *egsi* were  
358 relatively low but still highly significant for *L. v. ampelensis*, *S L. v. vulgaris* and *N L. v.*  
359 *vulgaris*.

### 360 *Phylogenetic results*

361 In concatenation analyses, we found that the individuals within STRUCTURE-defined  
362 genetic groups always formed clades with posterior probabilities (PP) of 1.0, we therefore  
363 collapsed individuals into groups and show a consensus tree over all replicates (Fig. 2A) and



364 separately for each of the 10 concatenation replicates (Fig. S4). The positions of some clades  
365 were consistent across all replicates and were always fully supported (PP = 1.0). These  
366 included the basal placement of *L. montandoni*, the subsequent split of a clade composed of *L.*  
367 *v. graecus* and *L. v. kosswigi* and the sister group relationship of *L. v. meridionalis* and *S L. v.*  
368 *vulgaris*. Moreover, the concatenated analyses invariably identified a fully supported clade  
369 composed of *L. v. lantzi*, *L. v. schmidtleri*, *S L. v. vulgaris*, *N L. v. vulgaris*, *L. v. ampelensis*  
370 and *L. v. meridionalis*. Our replicate analyses differed in the choice of sequences at  
371 heterozygous loci during the concatenation process; the results show that this influenced the  
372 branching patterns of the concatenated phylogenetic analyses by altering the positions of 4  
373 taxa (*N L. v. vulgaris*, *L. v. schmidtleri*, *L. v. lantzi*, and *L. v. ampelensis*). Nearly all  
374 alternative arrangements were strongly supported in one or more concatenation replicates  
375 (Fig. S4).

376 A consensus of the 50 replicate primary concordance trees (Fig. 2B) shows that all *L.*  
377 *vulgaris* taxa grouped together (to the exclusion of *L. montandoni*) across all replicates. The  
378 mean concordance factor represented by the mean number of genes supporting this clade was  
379  $20.5 \pm 2.2$  out of a total of 70 genes. Other relatively well-supported clades include the sister  
380 group relationship of *L. v. graecus* and *L. v. kosswigi*, as well as *S L. v. vulgaris* and *L. v.*  
381 *meridionalis*, and a clade composed of *L. v. lantzi*, *L. v. schmidtleri*, *N L. v. vulgaris*, *L. v.*  
382 *ampelensis*, *S L. v. vulgaris* and *L. v. meridionalis*. In each case concordance factors were low  
383 (<10 genes with the exception of *S L. v. vulgaris* and *L. v. meridionalis*), suggesting that more  
384 than one tree may equally well describe the history of these taxa. We examined this issue by  
385 extracting concordance factors from each replicate BUCKy analysis for clades with relatively  
386 high support (mostly encompassing those with two terminal taxa, Fig. S5). Primary histories  
387 were well-discernible in the cases of *L. montandoni*, *L. v. meridionalis*, *S L. v. vulgaris*, *L. v.*  
388 *lantzi*, *L. v. graecus* and *L. v. kosswigi*. However, between 3 and 6 primary histories could be

389 discerned for N *L. v. vulgaris*, *L. v. ampelensis* and *L. v. schmidtleri*, shown by similar mean  
390 concordance factors and largely overlapping quartiles (Fig. S5).

391 The multispecies coalescent model in BPP recovered a number of different species  
392 trees under the applied parameter settings (Table 1); their topologies and posterior  
393 probabilities varied depending on the prior specification, and to a limited extent, on seed  
394 number. Although the latter may suggest a lack of convergence, species trees with highest  
395 support were mostly consistent across analyses. Notably, *L. montandoni* and *L. v. ampelensis*  
396 were consistently recovered as sister taxa.

397 \*BEAST was not an effective tool for analyzing the full dataset. For analyses based on  
398 9 OTUs with 2 samples per taxon, parameter values converged for multiple runs of the same  
399 dataset and attained high effective sample sizes (all >200, most >1000). However, topological  
400 convergence was achieved in only 2 of 10 replicates, despite very similar likelihoods between  
401 replicate runs of the same dataset (Fig. S6). This suggests that the MCMCs became trapped  
402 on different peaks (i.e., different topologies) of high probability in independent runs. We  
403 attribute topological convergence problems to the large treespace involved in the analyses,  
404 and also to hybridization among taxa (see below). Furthermore, species tree topologies  
405 differed depending on the selected sequences (Fig. S6). In general, *L. v. graecus* and *L. v.*  
406 *kosswigi* were the most discrete in terms of node depth, while *L. montandoni* was consistently  
407 grouped with *L. v. ampelensis*, however, there was much uncertainty in clade heights and  
408 topology among taxa as shown by the scattered distribution of species trees in DensiTree plots  
409 (Fig. S6) and weakly supported summary trees. The only dense (but shallow) arrangement  
410 was found between S *L. v. vulgaris* and *L. v. meridionalis*.

411 *Genetic divergence and haplotype sharing among OTUs*

412 We found a gradient in divergence values ( $d_{xy}$ ) among newt OTUs ranging between 1.14-  
413 1.59% (Fig. 3, Table S6). Each pair of taxa shared identical haplotypes at several loci (Fig. 3),  
414 with the highest proportions shared between N *L. v. vulgaris* and *L. v. ampelensis* (9.1%), *L.*  
415 *montandoni* and two other lineages (7.5 and 6.7% for N *L. v. vulgaris*-*L. montandoni* and *L. v.*  
416 *ampelensis*-*L. montandoni*, respectively) and three pairs involving S *L. v. vulgaris* and  
417 neighboring clades *L. v. ampelensis*, N *L. v. vulgaris* and *L. v. meridionalis* (5.2, 4.6 and  
418 3.3%, respectively). All pairs involving the southern lineages shared few haplotypes (<3%).  
419 The slowly decaying tail starting at ca. 2% in the top panel of Figure 3 is probably indicative  
420 of the sharing of ancestral haplotypes.

#### 421 *Gene Flow among Taxa*

422 The maximum likelihood topologies recovered by TreeMix based on 1 or 5 SNPs per marker  
423 (Fig. 2C) were very similar to the consensus topology of the concatenated analysis (Fig. 2A).  
424 After adding migration edges, we found a genetic contribution from *Lva* into *Lmon*, followed  
425 by gene flow of lesser magnitude from *Lvg* and *Lvs* into the ancestor of *SLvv* and *Lvm* (Fig.  
426 2D and Fig. S7). A fourth migration edge was inferred from *Lvk* into the outgroup, which we  
427 consider uninterpretable because the outgroup was composed of 3 different newt species.

428 In most pairwise taxon comparisons within the ABC framework at least one model  
429 could reproduce the observed data (Tables S7 and S8). The analyses had good power to  
430 discriminate between the four models (Table S8). Posterior probabilities for models varied  
431 considerably among pairwise taxa comparisons (Fig. 4A) with a clear predominance of the  
432 admixture (ADM) model and only 6 comparisons in which recent (in the last 200 kya) or  
433 continuous gene flow prevailed. However, in many cases episodes of gene flow in the ADM  
434 model were timed to have occurred deep in the past (e.g. modal values for posteriors >1 Ma),  
435 making ADM and NGF equivalent in the sense of ruling out recent and constant gene flow

436 (e.g. in *L. v. kosswigi-L. v. meridionalis*, *L. v. kosswigi-L. v. graecus*, *L. v. kosswigi-L. v.*  
437 *lantzi*, *L. montandoni-L. v. lantzi*, *L. montandoni-S L. v. vulgaris*; Table S9). In other cases  
438 modal values for admixture times in the ADM model were inferred to have occurred  
439 relatively recently, close to the upper limit of the prior (e.g. *L. montandoni-L. v. ampelensis*,  
440 N *L. v. vulgaris-L. v. kosswigi*), making the ADM and RGF models comparable. However, we  
441 note that posterior distributions for the admixture time parameters were in many cases very  
442 broad, indicating that data were not very informative in dating admixture events.

443 Phylogenies estimated from mtDNA under the assumption of ILS substantially  
444 differed from trees estimated assuming mtDNA introgression (i.e. the topology was  
445 incongruent with the species tree based on nuclear data, Fig. 5). Under ILS both entire trees  
446 and internal branches were very short. Minimum mtDNA divergence between lineages readily  
447 distinguished between ILS and hybridization. For both *L. montandoni* and *L. v. graecus*,  
448 scenarios assuming hybridization fit the data well and were strongly preferred over ILS  
449 (Table 3). One of the two hybridization scenarios involving *L. montandoni* fit the data better  
450 than the other, although both hybridization scenarios had much better fit than ILS. Apparently  
451 the scenario assuming introgression between N *L. v. vulgaris* and *L. montandoni* received  
452 higher support because of more extensive mtDNA haplotype sharing between these two than  
453 between *L. montandoni* and *L. v. ampelensis*. Mean mtDNA divergence between lineages was  
454 not informative in distinguishing between ILS and hybridization as both scenarios generated  
455 mean divergence that was not significantly different from the observed values (data not  
456 shown).

## 457 **Discussion**

458 This study documents a series of lineages representing a continuum of genetic divergence  
459 with evidence for contact between lineages and potential gene flow, which we interpret as a

460 speciation continuum in *Lissotriton* newts. We show that a combination of population genetic  
461 and phylogenetic approaches is required to describe and probe this transition. However, even  
462 the most sophisticated existing methods are not completely satisfactory because they do not  
463 incorporate all essential aspects of the process. For example, multispecies coalescent models  
464 assume that incomplete lineage sorting (ILS) is the only source of genealogical discordance,  
465 effectively ignoring hybridization, which is of major importance in the divergence of many  
466 taxa (Mallet 2005; Abbott *et al.* 2013; Harrison & Larson 2014). In the following sections we  
467 discuss our findings for *Lissotriton* newts, their more general implications and outline  
468 research areas where methodological advances are needed.

#### 469 *Robust delimitation despite substantial gene flow*

470 All applied delimitation methods, based on allele frequencies, multispecies coalescent and  
471 genealogical concordance, robustly delimited nine evolutionary lineages. Some of these  
472 lineages correspond to described taxa, while others are morphologically cryptic (*N L. v.*  
473 *vulgaris*, *S L. v. vulgaris*) or include two distinct morphologies (*L. v. ampelensis*). This result  
474 is not an artifact of limited sampling under isolation by distance, because admixed individuals  
475 are rare and boundaries between lineages in well-sampled areas are sharp. The delimited  
476 entities are distinguishable in both allele frequency-based and genealogical frameworks, but  
477 are at various stages of divergence (Fig. 3). Substantial admixture between *N L. v. vulgaris*  
478 and *S L. v. vulgaris* in the postglacial expansion area in western Europe indicates that some  
479 lineages retain considerable potential for genetic exchange. We found evidence for recent  
480 gene flow between five other lineage pairs, confirming and extending previous work (Fig 4b;  
481 see Zieliński *et al.* 2016, for a detailed assessment of genetic exchange between *L.*  
482 *montandoni* and two *L. vulgaris* lineages). Moreover, episodes of gene flow between lineages  
483 in the more distant past may have been commonplace, given the overall weak support for the  
484 divergence with no gene flow model in the ABC analyses (Fig. 4), two cases of confirmed old

485 mtDNA introgression (Table 3), and several other instances of mtDNA parphyly (Babik *et*  
486 *al.* 2005; Nadachowska & Babik 2009; Pabijan *et al.* 2015). Thus, it is by no means certain  
487 that all delimited newt lineages will continue to evolve independently. The newt system is a  
488 good example of a broader phenomenon: as reproductive isolation progresses, the incipient  
489 species experience a prolonged phase of parapatric/allopatric structured populations which  
490 may episodically exchange genes. This interpretation is in line with recent genetic and  
491 molecular studies of speciation showing that post-divergence gene flow is common, e.g. it  
492 was an important feature of hominin history (Pääbo 2015), and sometimes occurs at high  
493 levels (e.g. Nevado *et al.* 2011; Muir *et al.* 2012; Sun *et al.* 2012; Osborne *et al.* 2016).

#### 494 *Newt phylogeny and evolution of male nuptial morphology*

495 The species tree of the *L. vulgaris* group could not be unequivocally resolved. Simulation  
496 studies indicate that multispecies coalescent-based species tree methods outperform  
497 concatenation even with a much smaller amount of genetic data, and can deal with substantial  
498 levels of incomplete lineage sorting (Ogilvie *et al.* 2016). In our case multispecies coalescent  
499 methods did not achieve topological convergence and most reconstructions produced by these  
500 methods were at odds with other evidence. The nontrivial amount of reticulate evolution  
501 among Central European newt taxa is likely the reason for the poor performance of \*BEAST  
502 and species tree estimation in BPP, because it violates their assumption that all discordance is  
503 due to ILS. It has been shown in simulations that gene flow between nonsister taxa leads to  
504 erroneous inference in species tree methods (Leaché *et al.* 2014; Solís-Lemus *et al.* 2016). In  
505 our analyses, conflicting evidence from various loci caused by mixing signals of introgression  
506 and ILS leads to multiple peaks in the posterior distributions of species trees and a lack of  
507 topological convergence. In this context, the concatenation and concordance analyses that we  
508 applied were more compatible with the TreeMix results that specifically incorporate  
509 reticulation, and hence more reliable in inferring the species tree in the presence of gene flow

510 among OTUs. Given the increasing number of studies reporting reticulate evolution, there is  
511 an urgent need for progress in methods co-estimating phylogeny and gene flow in  
512 multispecies and multilocus datasets; phylogenetic multilocus network methods (Yu *et al.*  
513 2013; 2014; Solís-Lemus & Ané 2016) appear promising in this respect.

514         The partially resolved species tree for the *L. vulgaris* group nonetheless sheds light on  
515 morphological evolution. The male nuptial morphology of *L. montandoni* consists of a  
516 smooth and low crest, prominent tail filament and dorso-lateral ridges. Similar male  
517 morphologies are also present in the more distantly related *L. helveticus*, *L. italicus* and *L.*  
518 *boscai*. This particular suite of phenotypic traits may be an adaptation for the effective  
519 transmission of waterborne pheromones (Pecio & Rafiński 1985) and could signify the  
520 predominance of olfactory cues for species recognition in these newts (Secondi *et al.* 2005).  
521 On the other hand, the derived condition of prominent crests and overall larger male body size  
522 in most *L. vulgaris* lineages indicates a shift towards visual cues (Secondi *et al.* 2012),  
523 although other explanations are possible such as divergence in female preference for larger  
524 male body size (Haerty *et al.* 2007; Secondi *et al.* 2010). Whatever the underlying cause(s),  
525 our species phylogeny shows that *montandoni*-like male morphology was present in the  
526 ancestral *L. vulgaris* population, conserved in the *L. v. kosswigi*/*L. v. graecus* clade, and  
527 replaced by the derived morphology in the sister clade giving rise to other extant *L. vulgaris*  
528 lineages. The intermediate breeding male morphologies of *L. v. ampelensis* and *L. v.*  
529 *meridionalis* (Raxworthy 1990) could be interpreted as independent, partial reversions to the  
530 ancestral morphology due to convergent evolution. Alternatively, and possibly more likely  
531 given the evidence for substantial gene flow from neighboring taxa, these intermediate  
532 morphologies could be the result of an influx of genes underlying the derived morphology and  
533 dilution of *montandoni*-like ancestral traits. These two hypotheses could be tested with  
534 genome-wide data.

535 *Isolation and gene flow revealed by ABC modeling*

536 Recognizing the limitations of existing methodologies, we explored gene flow between pairs  
537 of taxa in a model-based framework using Approximate Bayesian Computation (ABC). This  
538 approach, although quite simple, has been effective in unraveling the process of gene flow in  
539 the newt system. The data had good power in distinguishing among the four scenarios of gene  
540 flow and provided quantitative measures of support for the various models. However,  
541 analyses modeling gene flow between two populations without incorporation of additional  
542 populations have been criticized because ignoring such “ghost” populations may affect  
543 parameter estimates or even model choice (Beerli 2004; Slatkin 2005; Strasburg & Rieseberg  
544 2010; Eaton *et al.* 2015). We note though that pairwise comparisons among all extant taxa  
545 may partially alleviate this issue. The availability of all pairwise comparisons allows the  
546 identification and reinterpretation of problematic cases, such as support for recent gene flow  
547 between allopatric taxa which have not likely been in recent contact, but which both may have  
548 exchanged genes with other populations. In our case, inferences were largely consistent with  
549 geographic distributions of the lineages and we accept them as working hypotheses. In  
550 general, given the current state of the field, the use of simple pairwise models in complexes of  
551 interbreeding species may be useful because they offer a feasible way of distinguishing  
552 among different scenarios of gene flow and building more complex, but still testable,  
553 hypotheses.

554 In addition to model selection, ABC estimates demographic parameters which  
555 facilitate the interpretation of evolutionary history along the speciation continuum. Estimates  
556 of long-term, coalescent effective population sizes ( $N_e$ ) for the *Lissotriton* lineages are quite  
557 large, ranging roughly between 80,000 and 800,000 (Table S9). Independent assessments  
558 place the divergence time of *L. montandoni* and *L. vulgaris* between 3.7 to 6.3 mya (Stuglik &  
559 Babik 2016), while mtDNA lineages within *L. vulgaris* split in close succession during the



560 late Pliocene and Pleistocene (Babik *et al.* 2005; Pabijan *et al.* 2015). This timeframe suggests  
561 that most *Lissotriton* lineages have not attained the  $4N_e$  generations when roughly half of the  
562 loci in the genome achieve reciprocal monophyly (Hudson & Coyne 2002; Degnan &  
563 Rosenberg 2009), thus widespread incomplete lineage sorting (Table 2) and the presence of  
564 identical haplotypes amongst all lineage pairs are expected (Fig. 3). However, the lineages  
565 exchanging genes most extensively (*L. v. ampelensis*, *N. L. v. vulgaris*, *S. L. v. vulgaris*, *L. v.*  
566 *meridionalis*) also have the largest  $N_e$ 's (Fig. 4B, Table S9). This suggests that post-  
567 divergence gene flow contributed to elevated  $N_e$  estimates, although long-term population  
568 structure within lineages may also inflate  $N_e$ . We postulate that the existence of a transitional  
569 phase, in which differentiated lineages exchange genes, may explain or contribute to the large  
570 ancestral population sizes inferred by various methods (IM, ABC, PSMC) in many species  
571 (e.g. Won *et al.* 2005; Duvaux *et al.* 2011; Nadachowska-Brzyska *et al.* 2015).

572         One potentially important consequence of limited but persistent gene flow among a set  
573 of parapatrically distributed and non-reproductively isolated taxa is the opportunity for  
574 adaptive introgression. The flow of fitness-increasing genetic variants across species  
575 boundaries is a source of genetic and phenotypic variation and may increase rates of adaptive  
576 change in recipient species (Rieseberg *et al.* 2004; Hedrick 2013; Racimo *et al.* 2015). In  
577 divergent species, the parts of the genome most prone to genetic exchange may be those  
578 underlying phenotypic variation in systems challenged by new environments such as the skin  
579 and the immune system. There is tentative evidence for adaptive introgression of MHC class  
580 II genes between *L. montandoni* and several central European *L. vulgaris* lineages  
581 (Nadachowska-Brzyska *et al.* 2012). Thus, the overall pattern of genetic integrity in *L.*  
582 *montandoni* is breached by the interspecies transfer of neutral and putatively adaptive alleles.  
583 We suggest that the speciation continuum in *Lissotriton* newts documented herein may

584 provide a suitable system with multiple replicates to study the significance of introgression of  
585 adaptive variants from other species.

### 586 *Introgression explains mtDNA paraphyly*

587 With a partially resolved phylogeny, we were able to test statistically for mtDNA  
588 introgression suggested previously. We confirmed introgression in two of the most striking  
589 cases (from N *L. v. vulgaris* into *L. montandoni* and S *L. v. vulgaris* into *L. v. graecus*),  
590 effectively explaining the discordance between mtDNA, nuclear genes and morphology, and  
591 attributing it to extensive recent and ancient mtDNA introgression. While there is evidence  
592 that it has been accompanied by introgression of nuclear genes in the case of *L. montandoni*,  
593 we do not have strong evidence of nuclear introgression into *L. v. graecus*. Better power to  
594 reconstruct the extent and timing of nuclear introgression would be obtained with a larger  
595 amount of data, particularly from longer genomic regions to explore information contained in  
596 haplotype spectra (Harris & Nielsen 2013).

### 597 *Taxonomic Implications*

598 We note that the application of a rigid taxonomy in which we appropriate scientific names to  
599 all nine genetically distinct lineages delimited herein would not fully capture the intricacies of  
600 the evolutionary history of *Lissotriton* newts. As stated previously (Wiens 2007), the  
601 delimitation of species poses the problem of thresholding the continuous processes of  
602 speciation and lineage amalgamation. Although a number of authors have recognized some of  
603 the morphological *L. vulgaris* subspecies as full species (e.g. Dubois & Raffaëlli 2009;  
604 Skorinov *et al.* 2014; Wielstra *et al.* 2015; Frost 2016), these relegations were not based on  
605 new data but on inconclusive mtDNA variation, geographic range limits, and morphology.

606 We delimited three distinct southern taxa for which our data strongly suggest species  
607 status: *L. v. graecus* as *L. graecus* (Wolterstorff, 1906 ), *L. v. kosswigi* as *L. kosswigi*  
608 (Freitag, 1955), and *L. v. lantzi* as *L. lantzi* (Wolterstorff, 1914 ). We base this assertion on  
609 the concordant signals of divergence and independence from allele frequency- and genealogy-  
610 based delimitation methods, genealogical sorting, a nearly complete lack of hybrids in well-  
611 sampled areas and little evidence for genetic exchange in the recent past. Moreover, *L. lantzi*  
612 and *L. kosswigi* are allopatrically distributed (Skorinov *et al.* 2014; Wielstra *et al.* 2015),  
613 making gene exchange with other lineages improbable in the near future. On the other hand,  
614 four central European *L. vulgaris* lineages are interconnected by nontrivial amounts of gene  
615 flow. These taxa show fusion following range expansion in the morphologically cryptic N *L.*  
616 *v. vulgaris* and S *L. v. vulgaris*, extensive genetic exchange with neighboring lineages in *L. v.*  
617 *ampelensis*, and continuous gene flow since divergence between *L. v. meridionalis* and S *L. v.*  
618 *vulgaris*. These results suggest that we may be observing the loss of incipient divergence  
619 through hybridization in these taxa. Finally, although *L. v. schmidtleri* [and not *L.*  
620 *schmidtlerorum*, see Dubois (2007) and Dubois & Raffaëlli (2009)] is recovered as distinct in  
621 our analyses, we refrain from making a taxonomic judgment on this lineage pending more  
622 extensive sampling in northeastern Bulgaria and southern Romania, which may constitute a  
623 contact zone between several smooth newt lineages.

## 624 *Conclusions*

625 We found that *Lissotriton* newts represent a continuum of genetic divergence with varying  
626 levels of shared genetic variation among taxon pairs. This pattern invokes long-term isolation  
627 and independent evolution in three southern smooth newt species, genetic exchange across  
628 parapatric borders for several taxa in Central Europe, and effective fusion of previously  
629 separated gene pools of two lineages in the post-glacial expansion areas of Western Europe.  
630 The profound discordance between taxonomic boundaries and mtDNA in *Lissotriton* is

631 explained by extensive mtDNA introgression rather than by other processes. These features  
632 make the *L. vulgaris* species group a suitable system to examine the fission/fusion dynamics  
633 of the speciation continuum. The newt system is relevant because many species may have  
634 experienced such long-term structured populations. However, we also highlight that better  
635 methods, jointly modeling incomplete lineage sorting and gene flow, are needed to analyze  
636 such systems.

### 637 **Acknowledgments**

638 We thank Marcin Piwczyński and Ben Wielstra for insightful comments on the manuscript.  
639 Piotr Grodek, Marcin Liana and Krystyna Nadachowska-Brzyska offered invaluable help in  
640 the field. Pim Arntzen, Konstantinos Sotiropoulos and Ben Wielstra generously shared  
641 samples and locality information. The work was funded by the Polish National Science Centre  
642 (2012/04/A/NZ8/00662 to W.B) and the Jagiellonian University (DS/WBiNoZ/INoS/762/15).

643

## 644 References

- 645 Abbott R, Albach D, Ansell S, Arntzen JW, Baird SJ, Bierne N, Boughman J, Brelsford A, Buerkle CA, Buggs  
646 R, Butlin RK, Dieckmann U, Eroukhmanoff F, Grill A, Cahan SH, Hermansen JS, Hewitt G, Hudson AG,  
647 Jiggins C, Jones J, Keller B, Marczewski T, Mallet J, Martinez-Rodriguez P, Möst M, Mullen S, Nichols R,  
648 Nolte AW, Parisod C, Pfennig K, Rice AM, Ritchie MG, Seifert B, Smadja CM, Stelkens R, Szymura JM,  
649 Väinölä R, Wolf JB, Zinner D (2013) Hybridization and speciation. *Journal of Evolutionary Biology*, **26**,  
650 229–246.
- 651 Ané C, Larget B, Baum DA, Smith SD, Rokas A (2007) Bayesian estimation of concordance among gene trees.  
652 *Molecular Biology & Evolution*, **24**, 412–426.
- 653 Babik W, Rafiński J (2004) Relationship between morphometric and genetic variation in pure and hybrid  
654 populations of the smooth and Montandon's newt (*Triturus vulgaris* and *T. montandoni*). *Journal of Zoology*,  
655 **262**, 135–143.
- 656 Babik W, Szymura JM, Rafiński J (2003) Nuclear markers, mitochondrial DNA and male secondary sexual traits  
657 variation in a newt hybrid zone (*Triturus vulgaris* × *T. montandoni*). *Molecular Ecology*, **12**, 1913–1930.
- 658 Babik W, Branicki W, Crnobrnja-Isailović J, Cogălniceanu D, Sas I, Olgun K, Poyarkov NA, Garcia-París M,  
659 Arntzen JW (2005) Phylogeography of two European newt species—discordance between mtDNA and  
660 morphology. *Molecular Ecology*, **14**, 2475–2491.
- 661 Beerli P (2004) Effect of unsampled populations on the estimation of population sizes and migration rates  
662 between sampled populations. *Molecular Ecology*, **13**, 827–836.
- 663 Bouckaert RR (2010) DensiTree: making sense of sets of phylogenetic trees. *Bioinformatics*, **26**, 1372–1373.
- 664 Bouckaert R, Heled J, Kühnert D, Vaughan T, Wu CH, Xie D, Suchard MA, Rambaut A, Drummond AJ (2014)  
665 BEAST 2: a software platform for Bayesian evolutionary analysis. *PLoS Computational Biology*, **10**,  
666 e1003537.
- 667 Bour R, Bringsøe H, Vanderhaege M (2002) *Triturus vulgaris* (Linnaeus, 1758) at its southern limit: distribution  
668 on the Peloponnese, Greece, with range extensions from the Central and South Peloponnese. *Alytes*, **20**, 67–  
669 76.
- 670 Bousbouras D, Ioannidis Y (1997) The distribution and habitat preferences of the amphibians of Prespa National  
671 Park. In: *Lake Prespa, Northwestern Greece. A Unique Balkan Wetland* (eds. Crivelli AJ, Catsadorakis G),  
672 pp. 127–133. Springer, the Netherlands.
- 673 Coyne JA, Orr HA (2004) *Speciation*. Sinauer Associates, Sunderland, MA.
- 674 Cruickshank TE, Hahn MW (2014) Reanalysis suggests that genomic islands of speciation are due to reduced  
675 diversity, not reduced gene flow. *Molecular Ecology*, **23**, 3133–3157.
- 676 Cummings MP, Neel MC, Shaw KL (2008) A genealogical approach to quantifying lineage divergence.  
677 *Evolution*, **62**, 2411–2422.
- 678 Darriba D, Taboada GL, Doallo R, Posada D (2012) jModelTest 2: more models, new heuristics and parallel  
679 computing. *Nature Methods*, **9**, 772.
- 680 Degnan JH, Rosenberg NA (2009) Gene tree discordance, phylogenetic inference and the multispecies  
681 coalescent. *Trends in Ecology & Evolution*, **24**, 332–340.
- 682 de Queiroz K (2007) Species concepts and species delimitation. *Systematic Biology*, **56**, 879–886.
- 683 Dubois A (2007) Genitives of species and subspecies nomina derived from personal names should not be  
684 emended. *Zootaxa*, **1550**, 49–68.
- 685 Dubois A, Raffaëlli J (2009) A new ergotaxonomy of the family Salamandridae Goldfuss, 1820 (Amphibia,  
686 Urodela). *Alytes*, **26**, 1–85.
- 687 Duvaux L, Belkhir K, Boulesteix M, Boursot P (2011) Isolation and gene flow: inferring the speciation history  
688 of European house mice. *Molecular Ecology*, **20**, 5248–5264.
- 689 Earl DA, vonHoldt BM (2012) STRUCTURE HARVESTER: a website and program for visualizing  
690 STRUCTURE output and implementing the Evanno method. *Conservation Genetics Resources*, **4**, 359–361.
- 691 Eaton DA, Hipp AL, González-Rodríguez A, Cavender-Bares J (2015) Historical introgression among the  
692 American live oaks and the comparative nature of tests for introgression. *Evolution*, **69**, 2587–2601.
- 693 Excoffier L, Dupanloup I, Huerta-Sánchez E, Sousa VC, Foll M (2013) Robust demographic inference from  
694 genomic and SNP data. *PLoS Genetics*, **9**, e1003905.
- 695 Frost D.R. 2016. Amphibian Species of the World 6.0, an Online reference.  
696 <http://research.amnh.org/vz/herpetology/amphibia/> (accessed on 20/12/2016)
- 697 Harris K, Nielsen R (2013) Inferring demographic history from a spectrum of shared haplotype lengths. *PLoS*  
698 *Genetics*, **9**, e1003521.
- 699 Harrison RG, Larson EL (2014) Hybridization, introgression, and the nature of species boundaries. *Journal of*  
700 *Heredity*, **105**, 795–809.
- 701 Haerty W, Gentilhomme E, Secondi J (2007) Female preference for a male sexual trait uncorrelated with male

- 702 body size in the palmate newt (*Triturus helveticus*). *Behaviour*, **144**, 797–814.
- 703 Hedrick PW (2013) Adaptive introgression in animals: examples and comparison to new mutation and standing  
704 variation as sources of adaptive variation. *Molecular Ecology*, **22**, 4606–4618.
- 705 Heled J, Drummond AJ (2010) Bayesian inference of species trees from multilocus data. *Molecular Biology &*  
706 *Evolution*, **27**, 570–580.
- 707 Huang J-P, Knowles LL (2016) The species versus subspecies conundrum: quantitative delimitation from  
708 integrating multiple data types within a single Bayesian approach in Hercules beetles. *Systematic Biology*, **65**,  
709 685–699.
- 710 Hudson RR, Coyne JA (2002) Mathematical consequences of the genealogical species concept. *Evolution*, **56**,  
711 1557–1565.
- 712 Joyce DA, Lunt DH, Genner MJ, Turner GF, Bills R, Seehausen O (2011). Repeated colonization and  
713 hybridization in Lake Malawi cichlids. *Current Biology*, **21**, R108–R109.
- 714 Kotlík P, Zavadil V (1999) Natural hybrids between the newts *Triturus montandoni* and *T. vulgaris*:  
715 morphological and allozyme data evidence of recombination between parental genomes. *Folia Zoologica*, **48**,  
716 211–218.
- 717 Kopelman NM, Mayzel J, Jakobsson M, Rosenberg NA, Mayrose I (2015) Clumpak: a program for identifying  
718 clustering modes and packaging population structure inferences across K. *Molecular Ecology Resources*, **15**,  
719 1179–1191.
- 720 Krizmanic I, Mesaroš G, Džukic G, Kalezić ML (1997) Morphology of the smooth newt (*Triturus vulgaris*) in  
721 former Yugoslavia: taxonomical implications and distribution patterns. *Acta Zoologica Academiae*  
722 *Scientiarum Hungaricae*, **43**, 345–357.
- 723 Larget B, Kotha SK, Dewey CN, Ané C (2010) BUCKy: Gene tree / species tree reconciliation with the  
724 Bayesian concordance analysis. *Bioinformatics*, **26**, 2910–2911.
- 725 Leaché AD, Harris RB, Rannala B, Yang Z (2014) The influence of gene flow on species tree estimation: a  
726 simulation study. *Systematic Biology*, **63**, 17–30.
- 727 Leuenberger C, Wegmann D (2010) Bayesian computation and model selection without likelihoods. *Genetics*,  
728 **184**, 243–252.
- 729 Librado P, Rozas J (2009) DnaSP v5: A software for comprehensive analysis of DNA polymorphism data.  
730 *Bioinformatics*, **25**, 1451–1452.
- 731 Macgregor HC, Sessions SK, Arntzen JW (1990) An integrative analysis of phylogenetic relationships among  
732 newts of the genus *Triturus* (family Salamandridae), using comparative biochemistry, cytogenetics and  
733 reproductive interactions. *Journal of Evolutionary Biology*, **3**, 329–373.
- 734 Mallet J (2005) Hybridization as an invasion of the genome. *Trends in Ecology and Evolution*, **20**, 229–237.
- 735 Michalak P, Rafiński J (1999) Sexual isolation between two newt species, *Triturus vulgaris* and *T. montandoni*  
736 (Amphibia, Urodela, Salamandridae). *Biological Journal of the Linnean Society*, **67**, 343–352.
- 737 Michalak P, Grzesik J, Rafiński J (1997) Tests for sexual incompatibility between two newt species, *Triturus*  
738 *vulgaris* and *Triturus montandoni*: no-choice mating design. *Evolution*, **51**, 2045–2050.
- 739 Miller MA, Pfeiffer W, Schwartz T (2010) Creating the CIPRES Science Gateway for inference of large  
740 phylogenetic trees. *Proceedings of the Gateway Computing Environments Workshop (GCE)*, 1–8.
- 741 Muir G, Dixon CJ, Harper AL, Filatov DA (2012) Dynamics of drift, gene flow, and selection during speciation  
742 in *Silene*. *Evolution*, **66**, 1447–1458.
- 743 Nadachowska K, Babik W (2009) Divergence in the face of gene flow: the case of two newts (Amphibia:  
744 Salamandridae). *Molecular Biology & Evolution*, **26**, 829–841.
- 745 Nadachowska-Brzyska K, Zieliński P, Radwan J, Babik W (2012) Interspecific hybridization increases MHC  
746 class II diversity in two sister species of newts. *Molecular Ecology*, **21**, 887–906.
- 747 Nadachowska-Brzyska K, Li C, Smeds L, Zhang G, Ellegren H (2015) Temporal dynamics of avian populations  
748 during Pleistocene revealed by whole-genome sequences. *Current Biology*, **25**, 1375–1380.
- 749 Nevado B, Fazalova V, Backeljau T, Hanssens M, Verheyen E (2011) Repeated unidirectional introgression of  
750 nuclear and mitochondrial DNA between four congeneric Tanganyikan cichlids. *Molecular Biology &*  
751 *Evolution*, **28**, 2253–2267.
- 752 Nylander JA, Wilgenbusch JC, Warren DL, Swofford DL (2008) AWTY (are we there yet?): a system for  
753 graphical exploration of MCMC convergence in Bayesian phylogenetics. *Bioinformatics*, **24**, 581–583.
- 754 Ogilvie HA, Heled J, Xie D, Drummond AJ (2016) Computational performance and statistical accuracy of  
755 \*BEAST and comparisons with other methods. *Systematic Biology*, **65**, 381–396.
- 756 Osborne O, Chapman M, Nevado B, Filatov D (2016) Maintenance of species boundaries despite ongoing gene  
757 flow in ragworts. *Genome Biology & Evolution*, **8**, 1038–1047.
- 758 Pabijan M, Zieliński P, Dudek K, Chloupek M, Sotiropoulos K, Liana M, Babik W (2015) The dissection of a  
759 Pleistocene refugium: phylogeography of the smooth newt, *Lissotriton vulgaris*, in the Balkans. *Journal of*  
760 *Biogeography*, **42**, 671–683.
- 761 Pääbo S (2015) The diverse origins of the human gene pool. *Nature Reviews Genetics*, **16**, 313–314.

- 762 Pecio A, Rafiński J (1985) Sexual behaviour of the Montandon's newt, *Triturus montandoni*  
763 (Boulenger)(Caudata: Salamandridae). *Amphibia-Reptilia*, **6**, 11–22.
- 764 Petit RJ, Excoffier L (2009) Gene flow and species delimitation. *Trends in Ecology & Evolution*, **24**, 386–393.
- 765 Pickrell JK, Pritchard JK (2012) Inference of population splits and mixtures from genome-wide allele frequency  
766 data. *PLoS Genetics*, **8**, e1002967.
- 767 Pritchard JK, Stephens M, Donnelly P (2000) Inference of population structure using multilocus genotype data.  
768 *Genetics*, **155**, 945–959.
- 769 Racimo F, Sankararaman S, Nielsen R, Huerta-Sánchez E (2015) Evidence for archaic adaptive introgression in  
770 humans. *Nature Reviews Genetics*, **16**, 359–371.
- 771 Rafiński J, Arntzen JW (1987) Biochemical systematics of the Old World newts, genus *Triturus*: allozyme data.  
772 *Herpetologica*, **43**, 446–457.
- 773 Rambaut A, Drummond AJ (2007) Tracer v1. 5. <http://tree.bio.ed.ac.uk/software/tracer>
- 774 Rambaut A, Grass NC (1997) Seq-Gen: an application for the Monte Carlo simulation of DNA sequence  
775 evolution along phylogenetic trees. *Computer Applications in the Biosciences*, **13**, 235–238.
- 776 Rannala B, Yang Z (2013) Improved reversible jump algorithms for Bayesian species delimitation. *Genetics*,  
777 **194**, 245–253.
- 778 Raxworthy CJ (1990) A review of the smooth newt (*Triturus vulgaris*) subspecies, including an identification  
779 key. *Herpetological Journal*, **1**, 481–492.
- 780 Rieseberg LH, Burke JM (2001) The biological reality of species: gene flow, selection, and collective evolution.  
781 *Taxon*, **50**, 47–67.
- 782 Rieseberg LH, Church SA, Morjan CL (2004) Integration of populations and differentiation of species. *New*  
783 *Phytologist*, **161**, 59–69.
- 784 Rhymer JM, Simberloff D (1996) Extinction by hybridization and introgression. *Annual Review in Ecology &*  
785 *Systematics*, **27**, 83–109.
- 786 Ronquist F, Teslenko M, van der Mark P, Ayres DL, Darling A, Höhna S, Larget B, Liu L, Suchard MA,  
787 Huelsenbeck JP (2012) MrBayes 3.2: efficient Bayesian phylogenetic inference and model choice across a  
788 large model space. *Systematic Biology*, **61**, 539–542.
- 789 Rosenberg NA, Burke T, Elo K, Feldman MW, Freidlin PJ, Groenen MAM, Hillel J, Mäki-Tanila A, Tixier-  
790 Boichard M, Vignal A, Wimmers K, Weigend S (2010) Empirical evaluation of genetic clustering methods  
791 using multilocus genotypes from 20 chicken breeds. *Genetics*, **159**, 699–713.
- 792 Rudman SM, Schluter D (2016) Ecological impacts of reverse speciation in threespine stickleback. *Current*  
793 *Biology*, **26**, 490–495.
- 794 Schmidler JF, Franzen M (2004) *Triturus vulgaris* (Linnaeus, 1758)–Teichmolch. In: *Handbuch der Reptilien*  
795 *und Amphibien Europas* (eds. Grossenbacher K., Thiesemeier B.), pp. 847–967. Aula Verlag, Wiesbaden,  
796 Germany.
- 797 Schmidler JJ, Schmidler JF (1983) Verbreitung, Ökologie und unterartliche Gliederung von *Triturus vulgaris*  
798 in der adriatischen Küstengebieten (Amphibia, Salamandridae). *Spixiana*, **6**, 229–249.
- 799 Secondi J, Haerty W, Lodé T (2005) Female attraction to conspecific chemical cues in the palmate newt *Triturus*  
800 *helveticus*. *Ethology*, **111**, 726–735.
- 801 Secondi J, Johanet A, Pays , Cazimajou F, Djalout Z, Lemaire C (2010) Olfactory and visual species recognition  
802 in newts and their role in hybridization. *Behaviour*, **147**, 1693–1712.
- 803 Secondi J, Lepetz V, Théry M (2012) Male attractiveness is influenced by UV wavelengths in a newt species but  
804 not in its close relative. *PLoS One*, **7**, e30391.
- 805 Skorinov DV, Kuranova VN, Borkin LJ, Litvinchuk SN (2008) Distribution and conservation status of the  
806 Smooth Newt (*Lissotriton vulgaris*) in Western Siberia and Kazakhstan. *Russian Journal of Herpetology*, **15**,  
807 157–165.
- 808 Skorinov D, Doronin I, Kidov A, Tuniev B, Litvinchuk S (2014) Distribution and conservation status of the  
809 Caucasian newt, *Lissotriton lantzi* (Wolterstorff, 1914). *Russian Journal of Herpetology*, **21**, 251–268.
- 810 Slatkin M (1985) Gene flow in natural populations. *Annual Review in Ecology & Systematics*, **16**, 393–430.
- 811 Slatkin M (2005) Seeing ghosts: the effect of unsampled populations on migration rates estimated for sampled  
812 populations. *Molecular Ecology*, **14**, 67–73.
- 813 Solís-Lemus C, Ané C (2016) Inferring phylogenetic networks with maximum pseudolikelihood under  
814 incomplete lineage sorting. *PLoS Genetics*, **12**, e1005896.
- 815 Solís-Lemus C, Yang M, Ané C (2016) Inconsistency of species-tree methods under gene flow. *Systematic*  
816 *Biology*, available online, doi: 10.1093/sysbio/syw030.
- 817 Sousa V, Hey J (2013) Understanding the origin of species with genome-scale data: modelling gene flow. *Nature*  
818 *Reviews Genetics*, **14**, 404–414.
- 819 Speybroeck J, Beukema W, Crochet P-A (2010) A tentative species list of the European herpetofauna  
820 (Amphibia and Reptilia)—an update. *Zootaxa*, **2492**, 1–27.
- 821 Strasburg JL, Rieseberg LH (2010) How robust are “isolation with migration” analyses to violations of the IM

- 822 model? A simulation study. *Molecular Biology & Evolution*, **27**, 297–310.
- 823 Stuglik MT, Babik W (2016) Genomic heterogeneity of historical gene flow between two species of newts  
824 inferred from transcriptome data. *Ecology & Evolution*, **6**, 4513–4525.
- 825 Sun Y, Corcoran P, Menkis A, Whittle CA, Andersson SG, Johannesson H (2012) Large-scale introgression  
826 shapes the evolution of the mating-type chromosomes of the filamentous ascomycete *Neurospora*  
827 *tetrasperma*. *PLoS Genetics*, **8**, e1002820.
- 828 Tamura K, Stecher G, Peterson D, Filipski A, Kumar S (2013) MEGA6: molecular evolutionary genetics  
829 analysis version 6.0. *Molecular Biology & Evolution*, **30**, 2725–2729.
- 830 Wegmann D, Leuenberger C, Neuenschwander S, Excoffier L (2010) ABCtoolbox: a versatile toolkit for  
831 approximate Bayesian computations. *BMC Bioinformatics*, **11**, 116.
- 832 Wielstra B, Bozkurt E, Olgun K (2015) The distribution and taxonomy of *Lissotriton* newts in Turkey  
833 (Amphibia, Salamandridae). *ZooKeys*, **484**, 11–23.
- 834 Wiens JJ (2007) Species delimitation: new approaches for discovering diversity. *Systematic Biology*, **56**, 875–  
835 878.
- 836 Weisrock DW, Smith SD, Chan LM, Biebow K, Kappeler PM, Yoder AD (2012) Concatenation and  
837 concordance in the reconstruction of mouse lemur phylogeny: an empirical demonstration of the effect of  
838 allele sampling in phylogenetics. *Molecular Biology & Evolution*, **29**, 1615–1630.
- 839 Wolf JB, Ellegren H (2016) Making sense of genomic islands of differentiation in light of speciation. *Nature*  
840 *Reviews Genetics*, available online, doi:10.1038/nrg.2016.133
- 841 Won YJ, Sivasundar A, Wang Y, Hey J (2005) On the origin of Lake Malawi cichlid species: a population  
842 genetic analysis of divergence. *Proceedings of the National Academy of Sciences*, **102**, 6581–6586.
- 843 Yang Z (2015) The BPP program for species tree estimation and species delimitation. *Current Zoology*, **61**, 854–  
844 865.
- 845 Yang Z, Rannala B (2010) Bayesian species delimitation using multilocus sequence data. *Proceedings of the*  
846 *National Academy of Sciences*, **107**, 9264–9269.
- 847 Yang Z, Rannala B (2014) Unguided species delimitation using DNA sequence data from multiple loci.  
848 *Molecular Biology & Evolution*, **31**, 3125–3135.
- 849 Yu Y, Barnett RM, Nakhleh L (2013) Parsimonious inference of hybridization in the presence of incomplete  
850 lineage sorting. *Systematic Biology*, **62**, 738–751.
- 851 Yu Y, Dong J, Liu KJ, Nakhleh L (2014) Maximum likelihood inference of reticulate evolutionary histories.  
852 *Proceedings of the National Academy of Sciences*, **111**, 16448–16453.
- 853 Zieliński P, Nadachowska-Brzyska K, Wielstra B, Szkotak R, Covaciu-Marcov SD, Cogălniceanu D, Babik W  
854 (2013) No evidence for nuclear introgression despite complete mtDNA replacement in the Carpathian newt  
855 (*Lissotriton montandoni*). *Molecular Ecology*, **22**, 1884–1903.
- 856 Zieliński P, Stuglik MT, Dudek K, Konczal M, Babik W (2014) Development, validation and high-throughput  
857 analysis of sequence markers in nonmodel species. *Molecular Ecology Resources*, **14**, 352–360.
- 858 Zieliński P, Nadachowska-Brzyska K, Dudek K, and Babik W (2016) Divergence history of the Carpathian and  
859 smooth newts modelled in space and time. *Molecular Ecology*, **25**, 3912–3928.

860

## 861 **Data accessibility**

862 Input data and scripts used for data transformation and analysis are available in Dryad digital  
863 repository with doi:[to be submitted upon manuscript acceptance]. DNA sequence alignments  
864 for all markers were submitted to GenBank: accession nos. [to be submitted upon manuscript  
865 acceptance]. Additional analyses are provided as Supporting Information.

866



867 **Author Contributions**

868 MP and WB designed the research, analyzed the data and wrote the paper. KD and MP  
869 conducted laboratory analyses. PZ and MS contributed analytical tools and helped analyze the  
870 data. All authors approved of a final version of the manuscript.

871

872 **Table 1.** Joint Bayesian species delimitation and species tree estimation in the *Lissotriton*  
 873 *vulgaris* species group using BPP. Rows show results for different analyses; letters denote  
 874 replicate runs differing only by seed number. Population size ( $\theta$ ) and divergence time ( $\tau$ )  
 875 priors encompass a wide range of demographic and divergence scenarios. Starting guide tree  
 876 topologies were random unless specified otherwise (see footnotes). *N* species shows the  
 877 numbers of species and their posterior probabilities (PPs) in each analysis (PPs for each  
 878 species within analyses were always 1.00). *N* trees denotes the number of trees in the 95%  
 879 credibility set, and the last column shows the topology and posterior probability of the highest  
 880 ranked tree in the set.

| Runs            | $\theta^a$ | $\tau^a$   | <i>N</i> species (PP) | <i>N</i> trees | best tree and pp of model (delimitation + tree)                                                                                                                                                                                                                |
|-----------------|------------|------------|-----------------------|----------------|----------------------------------------------------------------------------------------------------------------------------------------------------------------------------------------------------------------------------------------------------------------|
| 1a              | G(1, 35)   | G(2, 500)  | 9 (1.00)              | 7              | ( <i>L. v. graecus</i> , ( <i>L. v. lantzi</i> , (( <i>L. v. schmidtleri</i> , <i>L. v. kosswigi</i> ), (( <i>S L. v. vulgaris</i> , <i>L. v. meridionalis</i> ), ( <i>N L. v. vulgaris</i> , ( <i>L. montandoni</i> , <i>L. v. ampelensis</i> )))))); 0.70905 |
| 1b              | G(1, 35)   | G(2, 500)  | 9 (1.00)              | 4              | ( <i>L. v. graecus</i> , ( <i>L. v. lantzi</i> , ( <i>L. v. kosswigi</i> , (( <i>S L. v. vulgaris</i> , <i>L. v. meridionalis</i> ), ( <i>L. v. schmidtleri</i> , ( <i>N L. v. vulgaris</i> , ( <i>L. montandoni</i> , <i>L. v. ampelensis</i> )))))); 0.83335 |
| 2a <sup>b</sup> | G(1, 35)   | G(2, 500)  | 9 (1.00)              | 4              | ( <i>L. v. graecus</i> , ( <i>L. v. lantzi</i> , ( <i>L. v. kosswigi</i> , (( <i>S L. v. vulgaris</i> , <i>L. v. meridionalis</i> ), ( <i>L. v. schmidtleri</i> , ( <i>N L. v. vulgaris</i> , ( <i>L. montandoni</i> , <i>L. v. ampelensis</i> )))))); 0.81770 |
| 2b <sup>b</sup> | G(1, 35)   | G(2, 500)  | 9 (1.00)              | 2              | ( <i>L. v. graecus</i> , ( <i>L. v. lantzi</i> , ( <i>L. v. kosswigi</i> , (( <i>S L. v. vulgaris</i> , <i>L. v. meridionalis</i> ), ( <i>L. v. schmidtleri</i> , ( <i>N L. v. vulgaris</i> , ( <i>L. montandoni</i> , <i>L. v. ampelensis</i> )))))); 0.88070 |
| 3a <sup>c</sup> | G(1, 35)   | G(2, 500)  | 9 (1.00)              | 3              | ( <i>L. v. graecus</i> , ( <i>L. v. lantzi</i> , ( <i>L. v. kosswigi</i> , (( <i>S L. v. vulgaris</i> , <i>L. v. meridionalis</i> ), ( <i>L. v. schmidtleri</i> , ( <i>N L. v. vulgaris</i> , ( <i>L. montandoni</i> , <i>L. v. ampelensis</i> )))))); 0.82170 |
| 3b <sup>c</sup> | G(1, 35)   | G(2, 500)  | 9 (1.00)              | 2              | ( <i>L. v. graecus</i> , ( <i>L. v. lantzi</i> , ( <i>L. v. kosswigi</i> , (( <i>S L. v. vulgaris</i> , <i>L. v. meridionalis</i> ), ( <i>L. v. schmidtleri</i> , ( <i>N L. v. vulgaris</i> , ( <i>L. montandoni</i> , <i>L. v. ampelensis</i> )))))); 0.85825 |
| 4a <sup>d</sup> | G(1, 35)   | G(2, 500)  | 9 (1.00)              | 3              | ( <i>L. v. graecus</i> , ( <i>L. v. lantzi</i> , ( <i>L. v. kosswigi</i> , (( <i>S L. v. vulgaris</i> , <i>L. v. meridionalis</i> ), ( <i>L. v. schmidtleri</i> , ( <i>N L. v. vulgaris</i> , ( <i>L. montandoni</i> , <i>L. v. ampelensis</i> )))))); 0.79815 |
| 4b <sup>d</sup> | G(1, 35)   | G(2, 500)  | 9 (1.00)              | 38             | ( <i>L. v. graecus</i> , ( <i>L. v. lantzi</i> , ( <i>L. v. kosswigi</i> , (( <i>S L. v. vulgaris</i> , <i>L. v. meridionalis</i> ), ( <i>L. v. schmidtleri</i> , ( <i>N L. v. vulgaris</i> , ( <i>L. montandoni</i> , <i>L. v. ampelensis</i> )))))); 0.43710 |
| 5a              | G(1, 10)   | G(2, 2000) | 9 (1.00)              | 9              | ( <i>L. v. graecus</i> , ( <i>L. v. lantzi</i> , ( <i>L. v. kosswigi</i> , ( <i>L. v. meridionalis</i> , ( <i>L. v. schmidtleri</i> , (( <i>L. montandoni</i> , <i>L. v. ampelensis</i> ), ( <i>N L. v. vulgaris</i> , <i>S L. v. vulgaris</i> )))))); 0.33805 |
| 5b              | G(1, 10)   | G(2, 2000) | 9 (1.00)              | 5              | ( <i>L. v. graecus</i> , ( <i>L. v. lantzi</i> , ( <i>L. v. kosswigi</i> , (( <i>S L. v. vulgaris</i> , <i>L. v. meridionalis</i> ), ( <i>L. v. schmidtleri</i> , ( <i>N L. v. vulgaris</i> , ( <i>L. montandoni</i> , <i>L. v. ampelensis</i> )))))); 0.71930 |
| 6a              | G(2,2000)  | G(2,2000)  | 9 (1.00)              | 50             | ( <i>L. v. meridionalis</i> , (( <i>L. v. graecus</i> , <i>L. v. lantzi</i> ), ( <i>S L. v. vulgaris</i> , ( <i>L. montandoni</i> , <i>L. v. ampelensis</i> ))), ( <i>N L. v. vulgaris</i> , ( <i>L. v. schmidtleri</i> , <i>L. v. kosswigi</i> ))); 0.13655   |
| 6b              | G(2,2000)  | G(2,2000)  | 9 (1.00)              | 45             | (( <i>L. v. graecus</i> , <i>L. v. lantzi</i> ), (( <i>L. v. schmidtleri</i> , <i>L. v. kosswigi</i> ), (( <i>S L. v. vulgaris</i> , <i>L. v. meridionalis</i> ), ( <i>N L. v. vulgaris</i> , ( <i>L. montandoni</i> , <i>L. v. ampelensis</i> ))))); 0.12370  |
| 7a              | G(1, 10)   | G(1, 10)   | 9 (1.00)              | 3              | ( <i>L. v. graecus</i> , ( <i>L. v. lantzi</i> , ( <i>L. v. kosswigi</i> , (( <i>S L. v. vulgaris</i> , <i>L. v. meridionalis</i> ), ( <i>L. v. schmidtleri</i> , ( <i>N L. v. vulgaris</i> , ( <i>L. montandoni</i> , <i>L. v. ampelensis</i> )))))); 0.66405 |
| 7b              | G(1, 10)   | G(1, 10)   | 9 (1.00)              | 5              | ( <i>L. v. graecus</i> , ( <i>L. v. lantzi</i> , (( <i>L. v. schmidtleri</i> , <i>L. v. kosswigi</i> ), (( <i>S L. v. vulgaris</i> , <i>L. v. meridionalis</i> ), ( <i>N L. v. vulgaris</i> , ( <i>L. montandoni</i> , <i>L. v. ampelensis</i> )))))); 0.77125 |
| 8a              | G(1, 10)   | G(2,1000)  | 9 (1.00)              | 3              | ( <i>L. v. graecus</i> , ( <i>L. v. lantzi</i> , (( <i>L. v. schmidtleri</i> , <i>L. v. kosswigi</i> ), (( <i>S L. v. vulgaris</i> , <i>L. v. meridionalis</i> ), ( <i>N L. v. vulgaris</i> , ( <i>L. montandoni</i> , <i>L. v. ampelensis</i> )))))); 0.80270 |
| 8b              | G(1, 10)   | G(2,1000)  | 9 (1.00)              | 9              | ( <i>L. v. graecus</i> , ( <i>L. v. lantzi</i> , ( <i>L. v. kosswigi</i> , (( <i>S L. v. vulgaris</i> , <i>L. v. meridionalis</i> ), ( <i>L. v. schmidtleri</i> , ( <i>N L. v. vulgaris</i> , ( <i>L. montandoni</i> , <i>L. v. ampelensis</i> )))))); 0.48025 |

<sup>a</sup> - G(1, 35), G(2, 500): empirically derived priors; G(1, 10), G(2, 2000): large populations with shallow divergence; G(2,2000), G(2,2000): small populations with shallow divergence; G(1, 10), G(1, 10): large populations with deep divergence; G(1, 10), G(2,1000): large populations with intermediate divergence

<sup>b</sup> - starting tree according to consensus phylogeny

<sup>c</sup> - starting tree reflects gene flow among *L. montandoni*, *L. v. ampelensis* and *N L. v. vulgaris*

<sup>d</sup> - starting tree reflects gene flow among *N L. v. vulgaris* and *S L. v. vulgaris*, basal position of *L. v. lantzi*

882 **Table 2.** Ensemble genealogical sorting index (*egsi*) for *Lissotriton* operational taxonomic  
883 units (10 alleles per group) based on 70 gene trees. All of the P values for *egsi* are <0.000001.  
884 The last column provides the number of gene trees in which a group reached complete  
885 monophyly.

| <b>group</b>                | <b>egsi</b> | <b>monophyly</b> |
|-----------------------------|-------------|------------------|
| <i>L. v. lantzi</i>         | 0.692       | 27               |
| <i>L. v. kosswigi</i>       | 0.679       | 30               |
| <i>L. v. graecus</i>        | 0.564       | 17               |
| <i>L. v. schmidtlerorum</i> | 0.559       | 14               |
| <i>L. montandoni</i>        | 0.548       | 16               |
| <i>L. v. meridionalis</i>   | 0.497       | 7                |
| <i>L. v. ampelensis</i>     | 0.349       | 0                |
| South <i>L. v. vulgaris</i> | 0.343       | 0                |
| North <i>L. v. vulgaris</i> | 0.281       | 0                |

886

887 **Table 3.** Evaluation of fit of mtDNA sequence data to scenarios of incomplete lineage sorting  
 888 (ILS) and hybridization (Hyb). *Lva* – *L. v. ampelensis*; *Lvg* – *L. v. graecus*; *Lvk* – *L. v.*  
 889 *kosswigi*; *Lvm* – *L. v. meridionalis*; *Lmon* – *L. montandoni*; *Lvs* – *L. v. schmidtleri*; *NLvv* –  
 890 North *L. v. vulgaris*; *SLvv* – South *L. v. vulgaris*

| Scenario                                                   | Pair of lineages           | Minimum divergence - Observed | Minimum divergence - Expected (median of 1000 simulations) | P       | Interpretation           |
|------------------------------------------------------------|----------------------------|-------------------------------|------------------------------------------------------------|---------|--------------------------|
| <b>mtDNA introgression into <i>L. montandoni</i></b>       |                            |                               |                                                            |         |                          |
| ILS                                                        | <i>Lmon-Lva</i>            | 0.0020                        | 0.0010                                                     | 0.258   | O = E                    |
|                                                            | <i>Lmon -NLvv</i>          | 0.0000                        | 0.0020                                                     | 0.294   | O = E                    |
|                                                            | <i>Lmon -Lvk</i>           | 0.0384                        | 0.0020                                                     | 0.002   | O > E                    |
|                                                            | <i>Lva-NLvv</i>            | 0.0020                        | 0.0010                                                     | 0.220   | O = E                    |
|                                                            | <i>Lva-Lvk</i>             | 0.0207                        | 0.0020                                                     | 0.006   | O > E                    |
|                                                            | <i>NLvv-Lvk</i>            | 0.0374                        | 0.0030                                                     | 0.002   | O > E                    |
|                                                            | Combined (Fisher's method) |                               |                                                            | 0.00002 | data do not fit scenario |
| Hyb1                                                       | <i>Lmon -Lva</i>           | 0.0020                        | 0.0010                                                     | 0.034   |                          |
|                                                            | <i>Lmon -NLvv</i>          | 0.0000                        | 0.0010                                                     | 0.500   | O = E                    |
|                                                            | <i>Lmon -Lvk</i>           | 0.0384                        | 0.0098                                                     | 0.046   | O > E                    |
|                                                            | <i>Lva-NLvv</i>            | 0.0020                        | 0.0010                                                     | 0.242   | O = E                    |
|                                                            | <i>Lva-Lvk</i>             | 0.0207                        | 0.0098                                                     | 0.150   | O = E                    |
|                                                            | <i>NLvv-Lvk</i>            | 0.0374                        | 0.0108                                                     | 0.066   | O = E                    |
|                                                            | Combined (Fisher's method) |                               |                                                            | 0.0095  | data do not fit scenario |
| Hyb2                                                       | <i>Lmon -Lva</i>           | 0.0020                        | 0.0020                                                     | 0.514   | O = E                    |
|                                                            | <i>Lmon -NLvv</i>          | 0.0000                        | 0.0000                                                     | 0.318   | O = E                    |
|                                                            | <i>Lmon -Lvk</i>           | 0.0384                        | 0.0089                                                     | 0.040   | O > E                    |
|                                                            | <i>Lva-NLvv</i>            | 0.0020                        | 0.0020                                                     | 0.824   | O = E                    |
|                                                            | <i>Lva-Lvk</i>             | 0.0207                        | 0.0089                                                     | 0.110   | O = E                    |
|                                                            | <i>NLvv-Lvk</i>            | 0.0374                        | 0.0098                                                     | 0.056   | O = E                    |
|                                                            | Combined (Fisher's method) |                               |                                                            | 0.0561  | data fit scenario        |
| <b>mtDNA introgression into <i>L. vulgaris graecus</i></b> |                            |                               |                                                            |         |                          |
| ILS                                                        | <i>Lvg -SLvv</i>           | 0.0000                        | 0.0049                                                     | 0.006   | O < E                    |
|                                                            | <i>Lvg -Lvm</i>            | 0.0139                        | 0.0059                                                     | 0.120   | O = E                    |
|                                                            | <i>Lvg -Lvs</i>            | 0.0208                        | 0.0059                                                     | 0.036   | O > E                    |
|                                                            | <i>SLvv-Lvm</i>            | 0.0069                        | 0.0039                                                     | 0.164   | O = E                    |
|                                                            | <i>SLvv-Lvs</i>            | 0.0139                        | 0.0049                                                     | 0.042   | O > E                    |
|                                                            | <i>Lvm-Lvs</i>             | 0.0396                        | 0.0069                                                     | 0.022   | O > E                    |
|                                                            | Combined (Fisher's method) |                               |                                                            | 0.0001  | data do not fit scenario |
| Hyb                                                        | <i>Lvg-SLvv</i>            | 0.0000                        | 0.0020                                                     | 0.180   | O = E                    |
|                                                            | <i>Lvg-Lvm</i>             | 0.0139                        | 0.0069                                                     | 0.086   | O = E                    |
|                                                            | <i>Lvg-Lvs</i>             | 0.0208                        | 0.0118                                                     | 0.212   | O = E                    |
|                                                            | <i>SLvv-Lvm</i>            | 0.0069                        | 0.0069                                                     | 0.832   | O = E                    |
|                                                            | <i>SLvv-Lvs</i>            | 0.0139                        | 0.0118                                                     | 0.560   | O = E                    |
|                                                            | <i>Lvm-Lvs</i>             | 0.0396                        | 0.0138                                                     | 0.080   | O = E                    |
|                                                            | Combined (Fisher's method) |                               |                                                            | 0.1152  | data fit scenario        |

891

892

893 **Figure 1.** Map with ranges of morphological subspecies (A). Delimitation of evolutionary  
894 lineages in the *Lissotriton vulgaris* species group in Structure (B). Pie charts show mean  
895 individual cluster membership coefficients. *Lva* – *L. v. ampelensis*; *Lvg* – *L. v. graecus*; *Lvk* –  
896 *L. v. kosswigi*; *Lvl* – *L. v. lantzi*; *Lvm* – *L. v. meridionalis*; *Lmon* – *L. montandoni*; *Lvs* – *L. v.*  
897 *schmidleri*; *NLv* – North *L. v. vulgaris*; *SLv* – South *L. v. vulgaris*

898

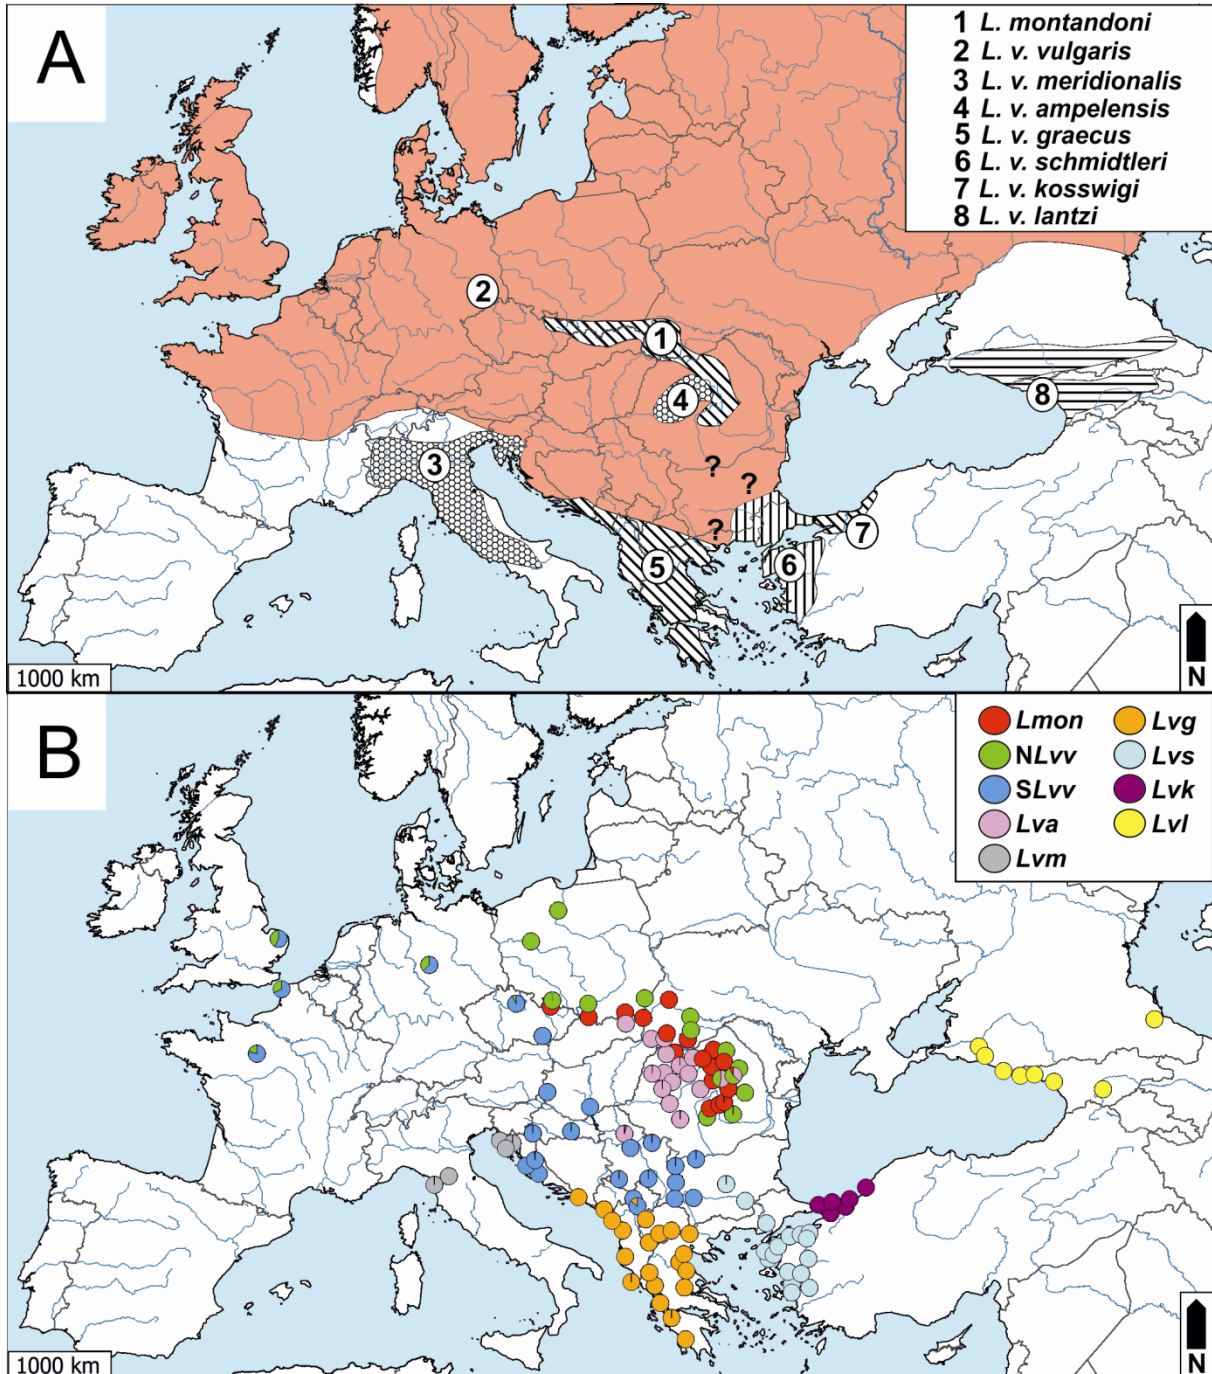

899

900 **Figure 2.** Phylogenetic relationships among STRUCTURE-delimited groups of *Lissotriton*  
901 newts; most genetic groups correspond to morphologically defined subspecies (except for *L.*  
902 *v. vulgaris* that is split into northeastern and southwestern lineages and *L. v. ampelensis* which  
903 contains two morphologies; see text for details). (A) Majority-rule consensus tree based on 10  
904 replicate analyses (Fig. S4) of 74 concatenated nuclear loci for a total of 36,918 bp; values  
905 designate the frequencies of clades found across replicates. (B) Majority-rule consensus of 50  
906 primary concordance trees. Frequency of clades over all replicates (top number) and  
907 concordance factors shown as the mean number of loci (out of 70) supporting the clade ( $\pm$   
908 SD). (C) Maximum likelihood tree as inferred by Treemix based on 355 SNPs; horizontal  
909 branch lengths are proportional to the amount of genetic drift that has occurred in each  
910 lineage. (D) Inferred evolutionary relationships among newt groups by TreeMix with one  
911 (left), two (middle) and three (right) migration events. The migration arrows are coloured  
912 according to their weights; the weight is correlated with the ancestry fraction.

913

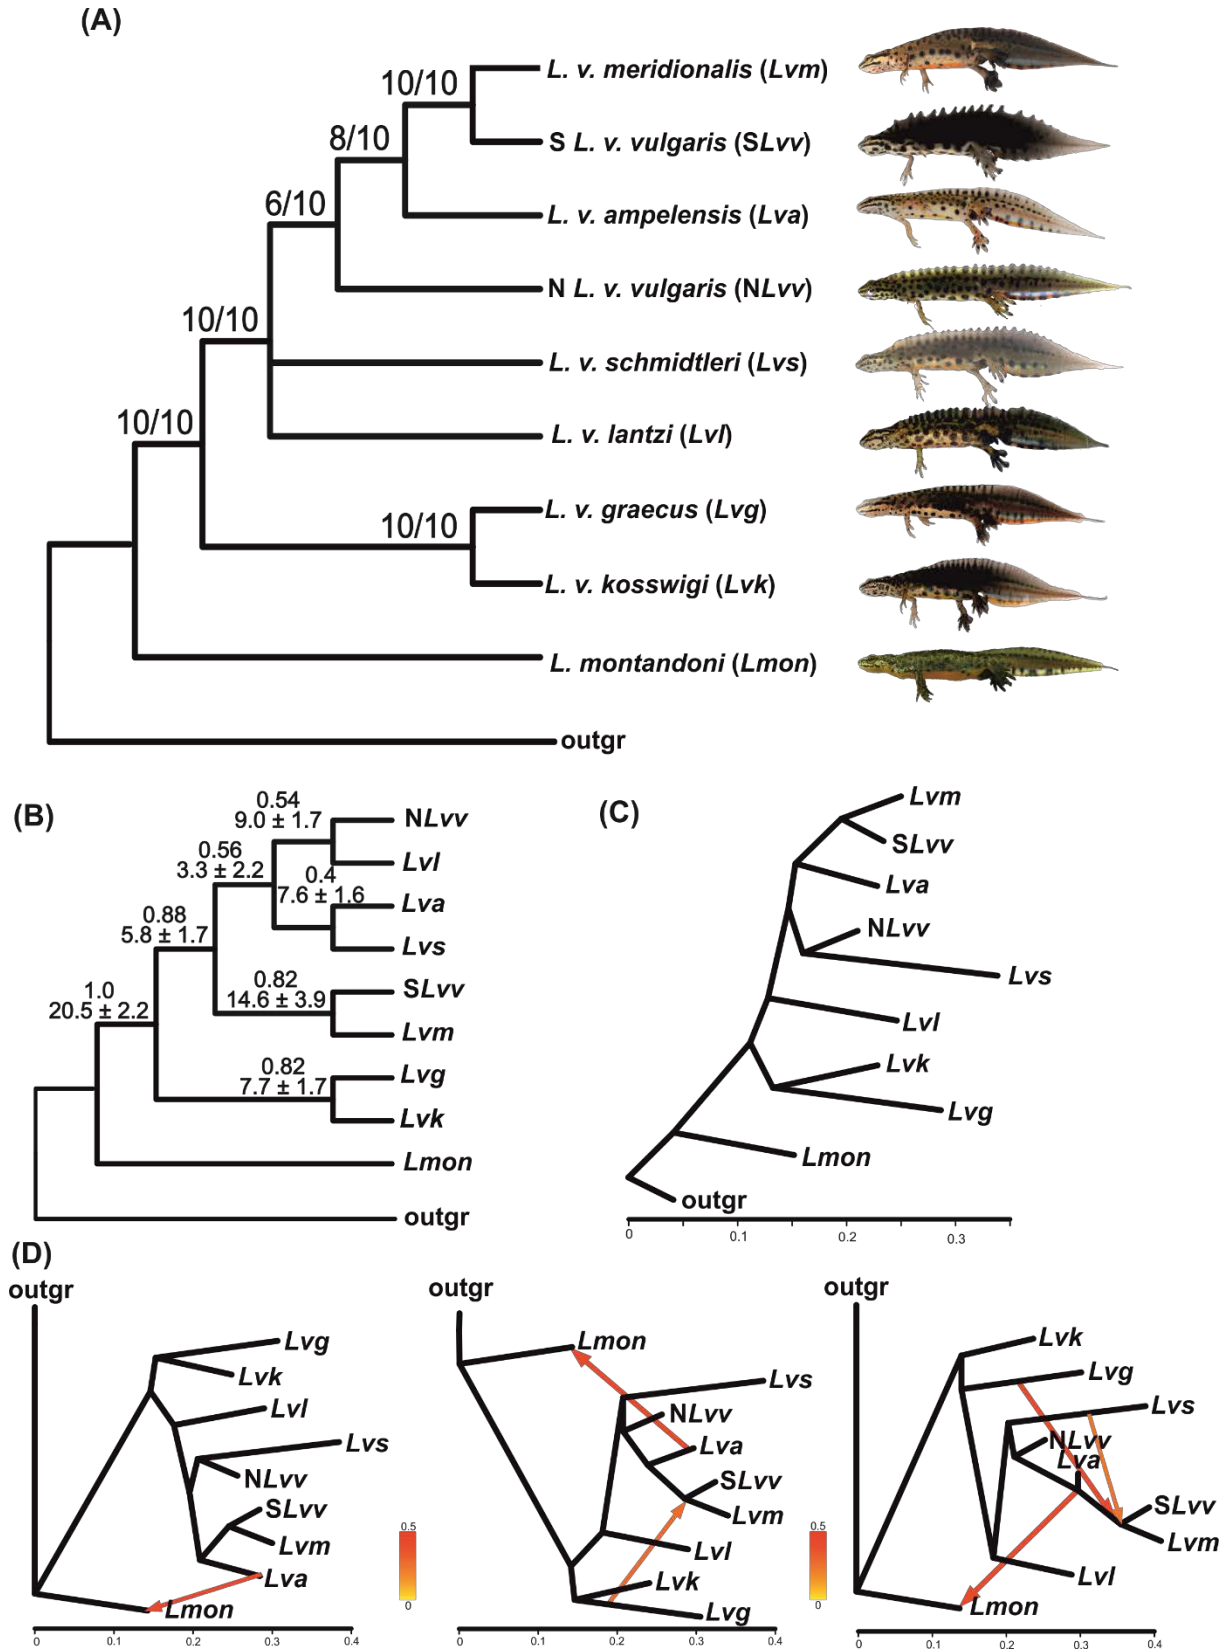

916 **Figure 3.** Top: proportion (in percent, left y-axis and solid circles) of shared haplotypes out of  
 917 total number of haplotypes summed for each taxon pair across 74 markers; values above solid  
 918 circles indicate the number of alleles shared by each taxon pair. Bottom: pairwise  $d_{xy}$   
 919 distances among *Lissotriton* taxa. *Lva* – *L. v. ampelensis*; *Lvg* – *L. v. graecus*; *Lvk* – *L. v.*  
 920 *kosswigi*; *Lvl* – *L. v. lantzi*; *Lvm* – *L. v. meridionalis*; *Lmon* – *L. montandoni*; *Lvs* – *L. v.*  
 921 *schmidleri*; *NLv* – North *L. v. vulgaris*; *SLv* – South *L. v. vulgaris*

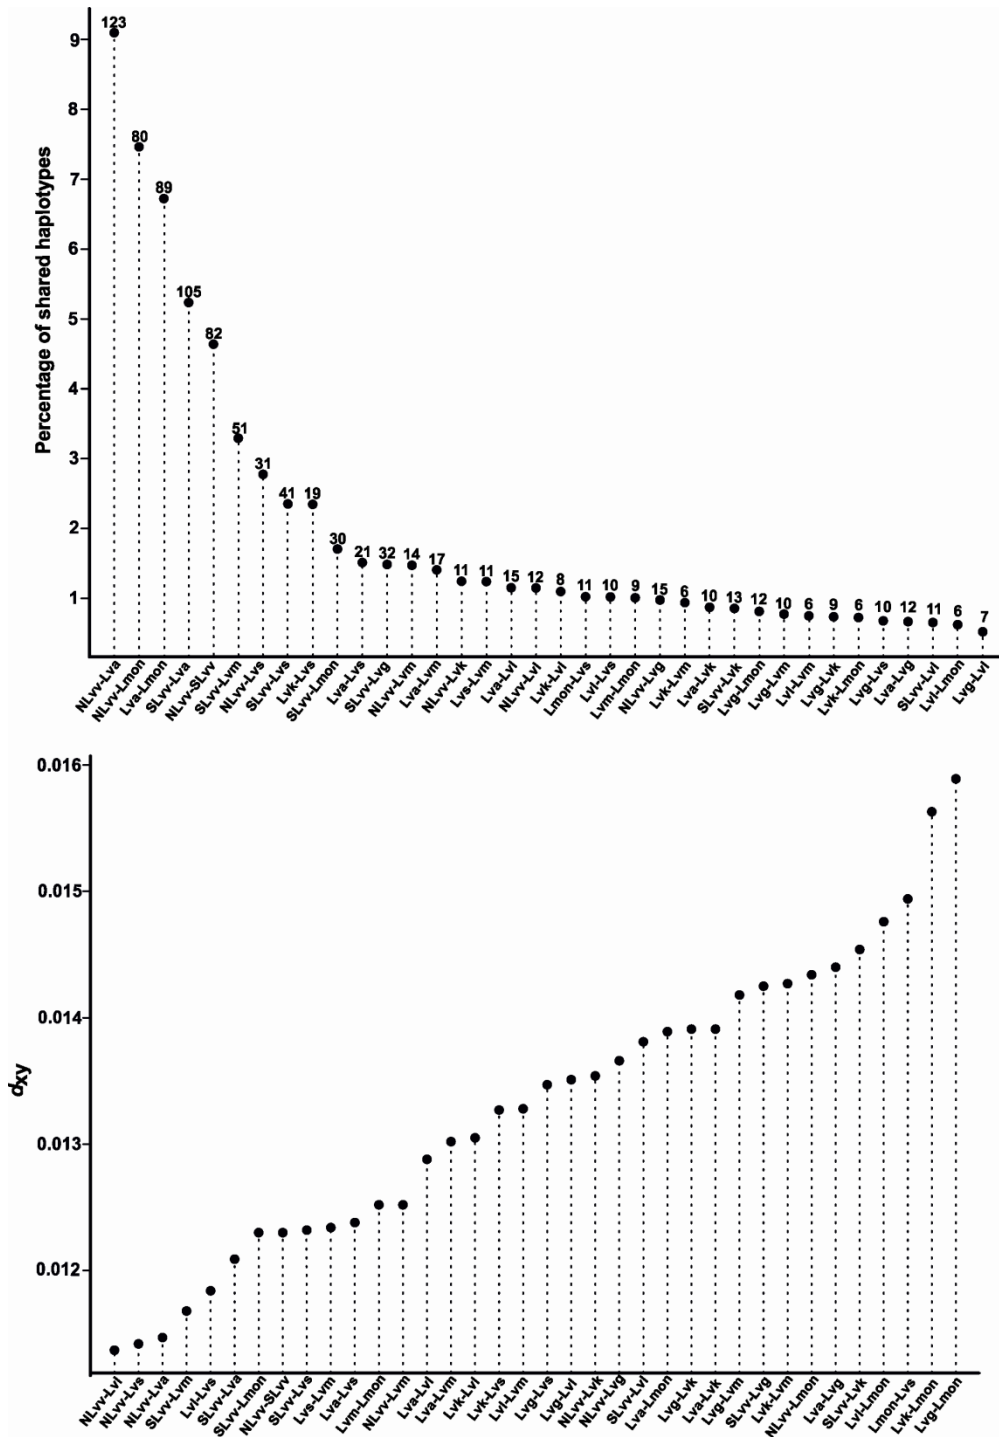

922

923



924 **Figure 4.** Pie charts representing posterior distributions of Approximate Bayesian  
 925 Computation analyses in pairwise taxon comparisons (A), color coded according to  
 926 demographic models (inset in A). *Lissotriton vulgaris* group phylogeny showing well-  
 927 supported instances of post-divergence gene flow (green arrows) and their corresponding  
 928 posterior distributions from the ABC analyses (B).

929

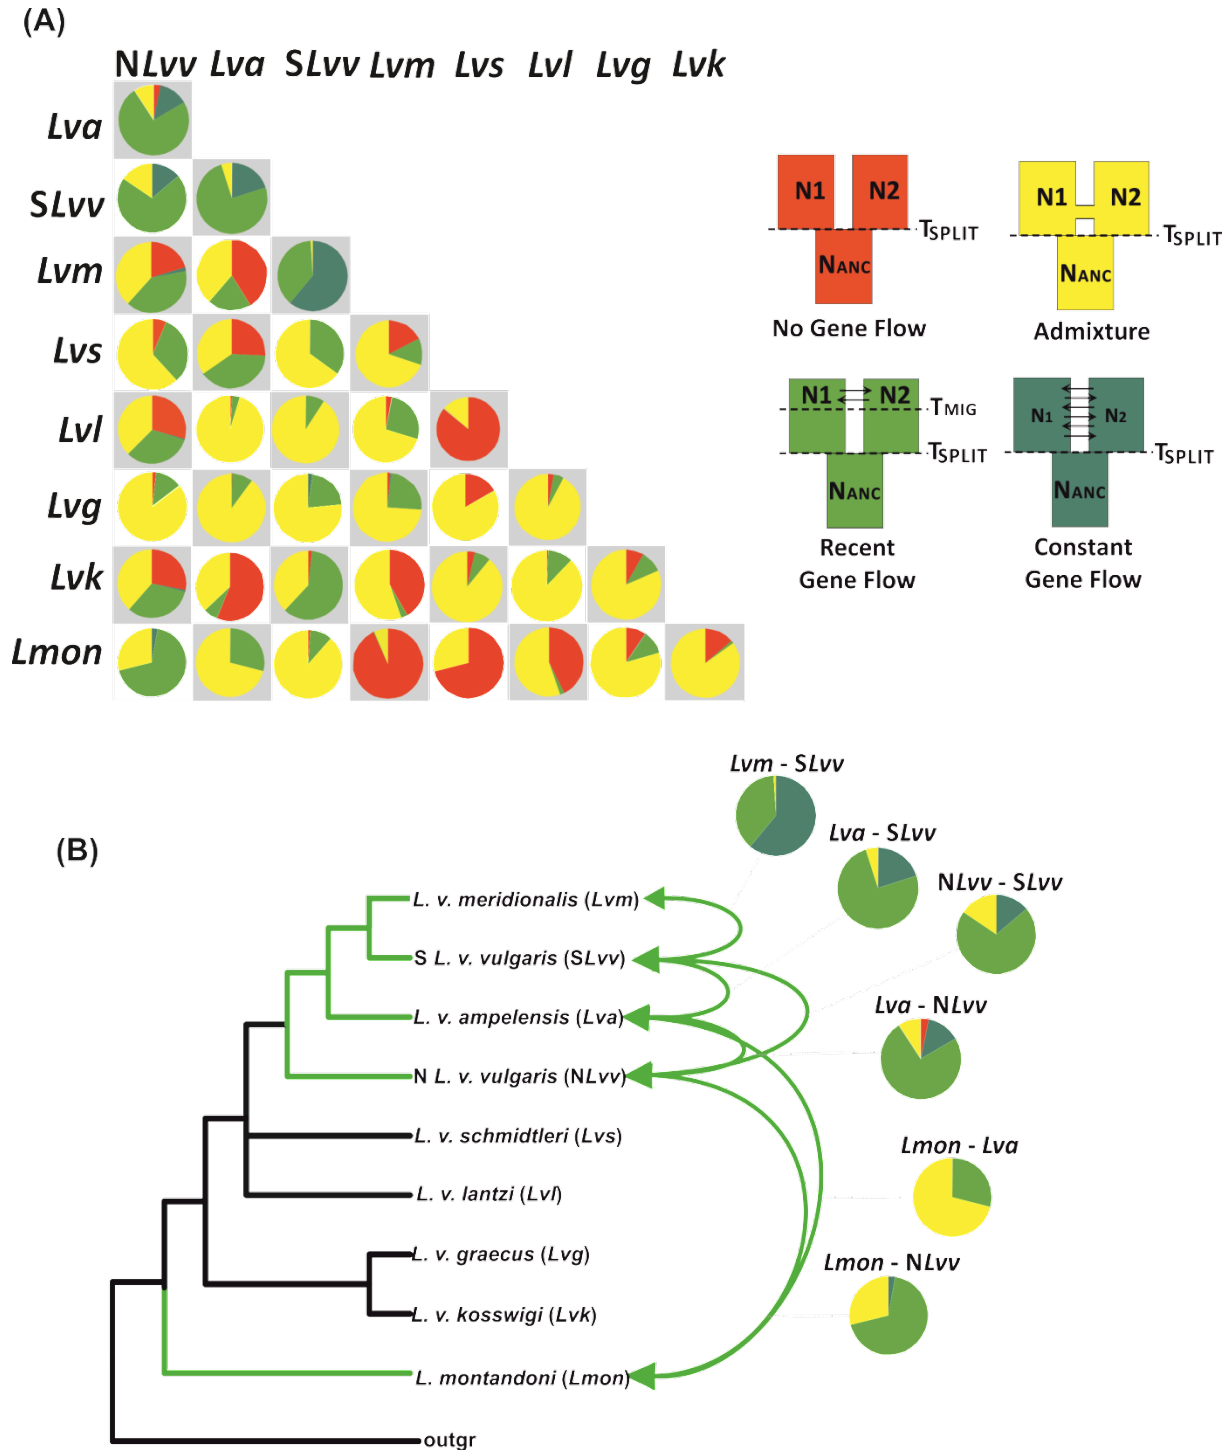

931 **Figure 5.** Parameters of species trees under competing scenarios of incomplete lineage  
 932 sorting (ILS) and hybridization (HYB). Both  $\theta$  and  $\tau$  are measured as the expected number of  
 933 mutations per site.

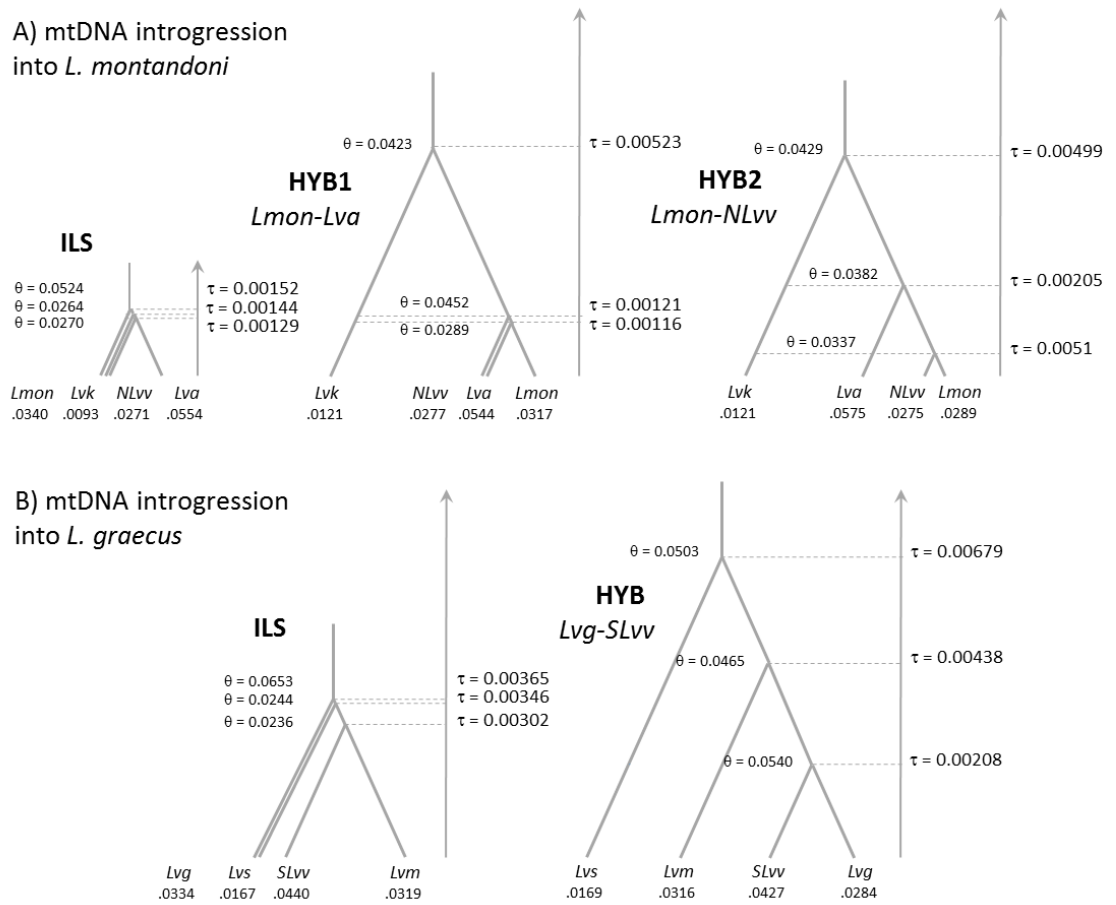

934

935

## 936 Supporting Information

937 **Extended Methods:** Validation of OTUs in BPP, phylogenetic analysis using BUCKy,  
938 \*BEAST analyses, and ABC analyses.

939 **Table S1.** A list of newt specimens with individual ID numbers, morphological species  
940 designation, geographical provenance and estimated proportion of genes in STRUCTURE-  
941 defined genetic clusters (c1-c9) representative of the species delimitation proposed in this  
942 study.

943 **Table S2.** Datasets used for species delimitation and phylogenetic reconstruction.

944 **Table S3.** Summary statistics for pairwise comparisons of *Lissotriton* taxa used in  
945 Approximate Bayesian Computation analyses.

946 **Table S4.** Summary of the nucleotide variation in 74 nuclear markers (mostly 3' UTR  
947 regions) in *Lissotriton vulgaris* (including all lineages delimited herein) and *L. montandoni*.

948 **Table S5.** Summary of STRUCTURE results for  $K = 7-12$ , iterated 10 times each for a total  
949 of 60 separate analyses.

950 **Table S6.** Pairwise matrix of  $d_{xy}$  values calculated for newt OTUs.

951 **Table S7.** Results of Approximate Bayesian Computation analyses under four demographic  
952 models: no gene flow (NGF), constant gene flow after divergence (CGF), recent (<200 kya)  
953 gene flow (RGF), and instantaneous admixture after divergence (ADM).

954 **Table S8.** Power analysis for Approximate Bayesian Analyses.

955 **Table S9.** Prior and posterior distributions for best model in pairwise taxon comparisons in  
956 *Lissotriton* newts from ABC analyses.

957

958 **Figure S1.** Relationships among major mtDNA lineages (denoted by capital letters) in  
959 *Lissotriton*, modified from Pabijan *et al.* (2015).

960 **Figure S2.** Estimated  $L_n$  probability of the data for a given  $K$ , from STRUCTURE  
961 HARVESTER; ten replicate analyses were run for each  $K$ .

962 **Figure S3.** Additional substructure found within South *L. v. vulgaris* and *L. v. graecus*.

963 **Figure S4.** Consensus trees from 10 replicates of concatenated analyses in MrBayes.

964 **Figure S5.** Variation in concordance factors (expressed as the number of genes supporting a  
965 particular clade) for main clades found in 50 replicate BUCKy analyses.

966 **Figure S6.** \*BEAST results including (A) DensiTree diagrams, (B) plots of posterior  
967 probabilities for all splits for paired runs of the same analysis revealing consistency in  
968 retrieving the same species tree topology, and (C) 95% highest posterior density intervals for  
969 three key parameters (log likelihood, posterior and species tree height) from \*BEAST  
970 analyses compared for paired runs.

971 **Figure S7.** Scaled residual fit from the TreeMix analysis based on the maximum likelihood  
972 tree in Fig. 2C (no migration edges).
